# Supplementary material for: Mutational signatures of redox stress in yeast single-strand DNA and of aging in human mitochondrial DNA share a common feature
Source: PLoS Biol. 2019 May 8;17(5):e3000263. doi: 10.1371/journal.pbio.3000263 (PMC6527239; doi:10.1371/journal.pbio.3000263)
Supplement: S7 Table — (XLSX) [file pbio.3000263.s015.xlsx]

## Sheet: Legend
Knowledge-based mutation enrichment and minimum mutation loads attributable to the gCg_to_T and ggCg_to_T redox mutation signatures. When mutation motifs are shown in tri-nucleotide format, mutated nucleotide is capitalized and flanking nucleotides are in small letters. All nucleotides of motifs in DNA sequence context are shown in small letters.
The sheets in the table are as follows:
gCg_to_T_BLCA
gCg_to_T_BRCA
gCg_to_T_CRC
gCg_to_T_GBM
gCg_to_T_HNSC
gCg_to_T_KICH
gCg_to_T_KIRC
gCg_to_T_LGG
gCg_to_T_LUAD
gCg_to_T_LUSC
gCg_to_T_PRAD
gCg_to_T_SKCM
gCg_to_T_THCA
gCg_to_T_UCEC
ggCg_to_T_BLCA
ggCg_to_T_BRCA
ggCg_to_T_CRC
ggCg_to_T_GBM
ggCg_to_T_HNSC
ggCg_to_T_KICH
ggCg_to_T_KIRC
ggCg_to_T_LGG
ggCg_to_T_LUAD
ggCg_to_T_LUSC
ggCg_to_T_PRAD
ggCg_to_T_SKCM
ggCg_to_T_THCA
ggCg_to_T_UCEC
Description of the fields in the table are provided below using gCg_to_T as an example.
Sample	Unique tumor identifier from TCGA
A_T_coord_clusters	the number of clusters in a sample composed either entirely of base substitutions at adenines or entirely of base substitutions at thymines.
G_C_coord_clusters	the number of clusters in a sample composed either entirely of base substitutions at guanines or entirely of base substitutions at cytosines.
Non_coord_clusters	the number of clusters in a sample composed of any mix of mutation types.
clusters	the total number of clusters identified in a sample.
mutations	the total number of mutations identified in a sample.
complex	the total number of complex mutations (multiple sequence changes within 10 nucleotides of each other) identified in a sample.
substitutions	the total number of base substitutions identified in a sample.
bases	the total number of bases within all 41 nucleotide sequence contexts in a sample. This is equivalent to the number of base substitutions in a sample multiplied by 41.
A_to_T	the total number of adenine to thymine substitutions in a sample.
A_to_G	the total number of adenine to guanine substitutions in a sample.
A_to_C	the total number of adenine to cytosine substitutions in a sample.
A	the total number of adenine substitutions in a sample.
a	the total number of adenines present within all the 41 nucleotide contexts analyzed in a sample.
T_to_A	the total number of thymine to adenine substitutions in a sample.
T_to_C	the total number of thymine to cytosine substitutions in a sample.
T_to_G	the total number of thymine to guanine substitutions in a sample.
T	the total number of thymine substitutions in a sample.
t	the total number of thymines present within all the 41 nucleotide contexts analyzed in a sample.
G_to_C	the total number of guanine to cytosine substitutions in a sample.
G_to_T	the total number of guanine to thymine substitutions in a sample.
G_to_A	the total number of guanine to adenine substitutions in a sample.
G	the total number of guanine substitutions in a sample.
g	the total number of guanines present within all the 41 nucleotide contexts analyzed in a sample.
C_to_G	the total number of cytosine to guanine substitutions in a sample.
C_to_A	the total number of cytosine to adenine substitutions in a sample.
C_to_T	the total number of cytosine to thymine substitutions in a sample.
C	the total number of cytosine substitutions in a sample.
c	the total number of cytosines present within all the 41 nucleotide contexts analyzed in a sample.
gCg_to_G	the total number of cytosine to guanine substitutions in a sample where the mutated cytosine is preceded by a 5’ guanine and followed by a 3’ guanine (i.e. the number of times the sequence gCg is changed to gGg in a sample).
gCg_to_A	the total number of cytosine to adenine substitutions in a sample where the mutated cytosine is preceded by a 5’ guanine and followed by a 3’ guanine (i.e. the number of times the sequence gCg is changed to gAg in a sample).
gCg_to_T	the total number of cytosine to thymine substitutions in a sample where the mutated cytosine is preceded by a 5’ guanine and followed by a 3’ guanine (i.e. the number of times the sequence gCg is changed to gTg in a sample).
gCg	the total number of cytosine substitutions in a sample where the mutated cytosine is preceded by a 5’ guanine and followed by a 3’ guanine.
gcg	the total number of times the sequence gcg and cgc occur in all of the 41 nucleotide sequence contexts of a sample.
gCg_per_mut	The fraction of total mutations in a sample that involve the substitution of a cytosine preceded by a 5’ guanine and followed by a 3’ guanine. This is calculated by dividing the value for “gCg” by the value for “mutations.”
gCg_per_C	The fraction of total substituted cytosines in a sample that occur with a 5’ guanine and a 3’ guanine. This is calculated by dividing the value for “gCg” by the value for “C.”
gcg_per_c	The fraction of total cytosines in all the 41 nucleotide sequence contexts in a sample that occur with a 5’ guanine and a 3’ guanine. This is calculated by dividing the value for “gcg” by the value for “c.”
enrich_gCg	The fold enrichment of cytosine substitutions preceded by a 5’ guanine and a 3’ guanine among all cytosines over the fraction of cytosines in 41 nucleotide sequence contexts that occur in the contexts of gcg and cgc. This is calculated by dividing the value for “gCg_per_C” by the value for “gcg_per_c.”
freq_gCg	the fraction of gcg and cgc sequences in all the 41 nucleotide contexts in a sample where the cytosine is substituted. This is calculated by dividing the value for “gCg” by the value for “gcg.”
cGc_to_C	the total number of guanine to cytosine substitutions in a sample where the mutated guanine is preceded by a 5’ guanine and a 3’ guanine (i.e. the number of times the sequence cGc is changed to cCc in a sample).
cGc_to_T	the total number of guanine to thymine substitutions in a sample where the mutated guanine is preceded by 5’ guanine and a 3’ guanine (i.e. the number of times the sequence cGc is changed to cTc in a sample).
cGc_to_A	the total number of guanine to adenine substitutions in a sample where the mutated guanine is preceded by a 5’ guanine and a 3’ guanine (i.e. the number of times the sequence cGc is changed to cAc in a sample).
cGc	the total number of guanine substitutions in a sample where the mutated guanine is preceded by a 5’ guanine and a 3’ guanine.
cgc	the total number of times the sequence cgc and gcg occur in all of the 41 nucleotide sequence contexts of a sample.
cGc_per_mut	The fraction of total mutations in a sample that involve the substitution of a guanine preceded by a 5’ guanine and a 3’ guanine. This is calculated by dividing the value for “cGc” by the value for “mutations.”
cGc_per_G	The fraction of total substituted guanines in a sample that occur with a 5’ guanine and a 3’ guanine. This is calculated by dividing the value for “cGc” by the value for “G.”
cgc_per_g	The fraction of total guanines in all the 41 nucleotide sequence contexts in a sample that occur with a 5’ guanine and a 3’ guanine. This is calculated by dividing the value for “cgc” by the value for “g.”
enrich_cGc	The fold enrichment of guanine substitutions preceded by a 5’ guanine and a 3’ guanine among all guanines over the fraction of guanines in 41 nucleotide sequence contexts that occur in the contexts of cgc and gcg. This is calculated by dividing the value for “cGc_per_G” by the value for “cgc_per_g.”
freq_cGc	the fraction of cgc and gcg sequences in all the 41 nucleotide contexts in a sample where the guanine is substituted. This is calculated by dividing the value for “cGc” by the value for “cgc.”
[gCg_to_T+revcomp]_per_mut	The fraction of total mutations in a sample that are gCg_to_T signature mutations. This is calculated by adding the values in the columns “gCg_to_T” and "cGc_to_A” and then dividing the resulting total by the value in “mutations.”
gCg_to_T+revcomp	The total number of gCg_to_T signature mutations in a sample. This is calculated by adding the values in the columns “gCg_to_T” and "cGc_to_A”.
[C_to_T-gCg_to_T]+revcomp	the number of cytosine to guanine, and cytosine to thymine substitutions that do not occur in the sequences tct and tca plus the number of guanine to cytosine and guanine to adenine substitutions that do not occur in a sequence context of tga or aga for a sample. This is calculated by adding the values in columns “G_to_C,” “G_to_A,” “C_to_G,” and “C_to_T” and subtracting from the resulting total …
gcg+revcomp	the number of times the sequences gcg and cgc occur in all the 41 nucleotide sequence contexts in a sample. This is calculated by adding the values in “gcg” and “cgc”
c-gcg+revcomp	the number of cytosines and guanines in all the 41 nucleotide contexts in a sample that do not occur in the sequences gcg or cgc. This is calculated by adding the values in “c” and “g” and subtracting from the total the value in “gcg+cgc.”
Fisher_p-value_gCtoTg	p-value for statistical over-representation of APOBEC signature mutations in a sample. The p-value produced by comparing for each sample the ratio of “gCg_to_T” to “(C_to_T)-(gCg_to_T)” to the ratio of “gcg+cgc” to “c-gcg” by a one sided Fisher’s exact text, predicting that the ratio of “gCg_to_T” to “(C_to_T)-(gCg_to_T)” is greater than the ratio of “gcg+cgc” to “c-gcg”. All samples for which th…
BH_Fisher_p-value_gCtoTg	Benjamini-Hochberg-corrected p-values for statistical over-representation of gCg_to_T signature mutations in a sample. The resulting p-value generated by correcting the “Fisher_p-value_gCg” for multiple testing error by Benjamini-Hochberg (produced using p.adjust() in R).
bonferroni_Fisher_p-value_gCtoTg	Bonferroni-corrected p-values for statistical over-representation of gCg_to_T signature mutations in a sample. The resulting p-value generated by correcting the “Fisher_p-value_gCg” for multiple testing error by the Bonferroni method (produced using p.adjust() in R).
odds_ratio_gCtoTg	the odds ratio calculated for the comparison of the ratio of “gCg_to_T” to “(C_to_T)-(gCg_to_T)” to the ratio of “gcg+cgc” to “c-gcg” in each sample.
95%_confidence_lower_gCtoTg	the lower boundary of the 95% confidence interval for the odds ratio calculated for each sample in “odds_ratio_gCg”.
95%_confidence_upper_gCtoTg	the upper boundary of the 95% confidence interval for the odds ratio calculated for each sample in “odds_ratio_gCg”. Since this is a one sided Fisher’s test predicting that the ratio of “gCg_to_T” to “(C_to_T)-(gCg_to_T)” is greater than the ratio of “gcg+cgc” to “c-gcg,” this value is reported as “Inf” for infinite.
gCtoTg_enrich	the enrichment over random of APOBEC pattern mutations. This is calculated as: [(gCg_to_T)/ (C_to_T)]/[ gcg/c]. While not written in the formula, the complement sequences and mutations are included in the value provided in the file.
gCtoTg_MutLoad_MinEstimate

## Sheet: gCg_to_T_BLCA
Sample	A_T_coord_clusters	G_C_coord_clusters	Non_coord_clusters	clusters	mutations	complex	substitutions	bases	A_to_T	A_to_G	A_to_C	A	a	T_to_A	T_to_C	T_to_G	T	t	G_to_C	G_to_T	G_to_A	G	g	C_to_G	C_to_A	C_to_T	C	c	gCg_to_G	gCg_to_A	gCg_to_T	gCg	gcg	gCg_per_mut	gCg_per_C	gcg_per_c	enrich_gCg	freq_gCg	cGc_to_C	cGc_to_T	cGc_to_A	cGc	cgc	cGc_per_mut	cGc_per_G	cgc_per_g	enrich_cGc	freq_cGc	[gCg_to_T+revcomp]_per_mut
TCGA-BL-A13J-01A	4	38	57	99	9750	118	9632	394912	408	913	221	1542	116551	397	980	224	1601	116868	811	654	1776	3241	80348	836	628	1784	3248	81145	6	7	77	90	1073	0.00923077	0.0277094	0.0132232	2.0955	0.083877	5	14	81	100	1078	0.0102564	0.0308547	0.0134166	2.29973	0.0927644	0.0162051
TCGA-BT-A20P-01A	3	105	52	160	9127	105	9022	369902	238	484	147	869	108689	212	476	134	822	109466	1403	514	1587	3504	75789	1586	490	1751	3827	75958	4	7	112	123	1064	0.0134765	0.0321401	0.0140077	2.29445	0.115602	3	6	91	100	1030	0.0109565	0.0285388	0.0135904	2.09993	0.0970874	0.0222417
TCGA-BT-A20Q-01A	3	92	79	174	8105	110	7995	327795	159	340	113	612	95616	161	337	127	625	95056	1061	428	1904	3393	68901	1042	408	1915	3365	68222	2	3	86	91	1021	0.0112276	0.0270431	0.0149658	1.80699	0.0891283	2	8	100	110	1020	0.0135719	0.0324197	0.0148038	2.18995	0.107843	0.0229488
TCGA-BT-A20T-01A	0	160	101	261	26295	251	26044	1067804	401	1350	164	1915	313134	453	1286	183	1922	313957	3806	1152	6196	11154	221067	3751	1144	6158	11053	219646	4	20	91	115	2708	0.00437346	0.0104044	0.0123289	0.843903	0.0424668	7	19	97	123	2650	0.0046777	0.0110274	0.0119873	0.919925	0.0464151	0.00714965
TCGA-BT-A20V-01A	0	14	54	68	8611	115	8496	348336	435	567	242	1244	102329	395	568	233	1196	102519	725	659	1633	3017	71897	808	585	1646	3039	71591	7	4	139	150	1082	0.0174196	0.0493583	0.0151136	3.26582	0.138632	4	5	162	171	1084	0.0198583	0.0566788	0.0150771	3.75926	0.157749	0.0349553
TCGA-BT-A2LA-01A	2	65	41	108	13231	118	13113	537633	289	595	194	1078	154597	277	547	200	1024	154174	1531	739	3246	5516	114087	1457	703	3335	5495	114758	3	12	252	267	1792	0.0201799	0.0485896	0.0156155	3.11163	0.148996	7	12	240	259	1749	0.0195752	0.0469543	0.0153304	3.06282	0.148085	0.0371854
TCGA-BT-A3PH-01A	0	279	131	410	36357	266	36091	1479731	380	627	190	1197	427799	357	636	200	1193	430669	7568	1544	7736	16848	310264	7510	1496	7847	16853	310999	4	6	152	162	3889	0.00445581	0.00961253	0.0125049	0.768703	0.041656	5	10	206	221	3938	0.00607861	0.0131173	0.0126924	1.03347	0.0561199	0.0098468
TCGA-BT-A3PJ-01A	0	197	143	340	40588	343	40245	1650045	785	2528	784	4097	481111	756	2486	763	4005	481040	4829	1583	9769	16181	343993	4589	1676	9697	15962	343901	7	11	120	138	4065	0.00340002	0.00864553	0.0118203	0.731416	0.0339483	16	11	115	142	4179	0.00349857	0.00877572	0.0121485	0.722371	0.0339794	0.00578989
TCGA-CF-A27C-01A	0	163	87	250	13846	185	13661	560101	227	509	128	864	162734	252	506	85	843	163632	2175	638	2933	5746	116429	2374	729	3105	6208	117306	8	12	61	81	1564	0.00585007	0.0130477	0.0133327	0.978626	0.0517903	5	9	72	86	1594	0.00621118	0.0149669	0.0136907	1.09322	0.0539523	0.00960566
TCGA-CF-A3MF-01A	2	2	14	18	2828	33	2795	114595	121	239	86	446	33480	147	257	91	495	33725	73	258	626	957	23641	71	207	619	897	23749	0	5	88	93	481	0.0328854	0.103679	0.0202535	5.11907	0.193347	2	2	102	106	479	0.0374823	0.110763	0.0202614	5.46669	0.221294	0.0671853
TCGA-DK-A1A5-01A	0	286	157	443	27756	291	27465	1126065	281	827	182	1290	329023	326	822	162	1310	328957	4980	1149	6243	12372	233913	5115	1147	6231	12493	234172	7	8	84	99	2745	0.0035668	0.00792444	0.0117222	0.676022	0.0360656	7	13	86	106	2761	0.00381899	0.00856773	0.0118035	0.725862	0.0383919	0.0061248
TCGA-DK-A1A6-01A	1	217	151	369	30026	309	29717	1218397	792	1871	356	3019	358525	786	1893	327	3006	359138	4259	1737	5882	11878	250713	4318	1708	5788	11814	250021	10	28	140	178	3114	0.0059282	0.0150669	0.012455	1.20971	0.0571612	19	23	148	190	3055	0.00632785	0.015996	0.0121852	1.31273	0.0621931	0.00959169
TCGA-DK-A1AA-01A	1	31	41	73	11863	114	11749	481709	571	1556	148	2275	143159	590	1553	146	2289	144886	610	912	2003	3525	96468	684	906	2070	3660	97196	2	18	67	87	1259	0.00733373	0.0237705	0.0129532	1.8351	0.0691025	6	25	73	104	1296	0.00876675	0.0295035	0.0134345	2.1961	0.0802469	0.0118014
TCGA-DK-A1AE-01A	1	103	44	148	12948	126	12822	525702	431	677	276	1384	154415	432	665	313	1410	155968	1388	1078	2234	4700	107126	1593	1125	2610	5328	108193	8	9	99	116	1340	0.00895891	0.0217718	0.0123853	1.75788	0.0865672	6	10	82	98	1374	0.00756874	0.0208511	0.012826	1.62568	0.0713246	0.013979
TCGA-DK-A1AG-01A	0	99	42	141	8931	76	8855	363055	151	298	79	528	104755	154	283	86	523	105871	1251	373	1748	3372	75210	1826	423	2183	4432	77219	3	3	91	97	1007	0.010861	0.0218863	0.0130408	1.67829	0.0963257	4	3	68	75	1004	0.00839772	0.022242	0.0133493	1.66616	0.0747012	0.0178032
TCGA-DK-A3IL-01A	1	10	39	50	16013	128	15885	651285	782	1530	296	2608	188284	767	1453	303	2523	188420	888	1942	2507	5337	136224	863	1919	2635	5417	138357	9	27	126	162	1873	0.0101168	0.0299059	0.0135374	2.20912	0.0864923	12	35	113	160	1879	0.00999188	0.0299794	0.0137935	2.17345	0.0851517	0.0149254
TCGA-FD-A3N5-01A	1	9	28	38	33118	423	32695	1340495	1681	4913	1370	7964	398544	1674	4697	1303	7674	399442	1801	2428	4346	8575	271207	1776	2285	4421	8482	271302	21	38	143	202	3083	0.0060994	0.0238151	0.0113637	2.09572	0.0655206	18	35	121	174	3052	0.00525394	0.0202915	0.0112534	1.80315	0.0570118	0.0079715
TCGA-FD-A3N6-01A	0	18	20	38	13315	121	13194	540954	562	734	444	1740	159840	505	801	378	1684	160651	1243	1214	2486	4943	109197	1252	1091	2484	4827	111266	4	8	142	154	1619	0.0115659	0.0319039	0.0145507	2.1926	0.0951204	8	18	198	224	1693	0.0168231	0.0453166	0.0155041	2.92288	0.13231	0.0255351
TCGA-FT-A3EE-01A	1	40	36	77	10717	95	10622	435502	401	1148	330	1879	128222	390	1227	351	1968	128546	819	558	2084	3461	89320	704	587	2023	3314	89414	3	5	74	82	1221	0.00765139	0.0247435	0.0136556	1.81197	0.0671581	5	5	81	91	1213	0.00849118	0.026293	0.0135804	1.9361	0.0750206	0.014463
TCGA-GD-A2C5-01A	2	138	69	209	17602	161	17441	715081	547	1014	204	1765	210668	494	896	173	1563	213169	2286	1029	3424	6739	144720	2680	1041	3653	7374	146524	5	16	88	109	1675	0.00619248	0.0147817	0.0114316	1.29306	0.0650746	6	14	65	85	1600	0.004829	0.0126131	0.0110558	1.14086	0.053125	0.00869219
TCGA-H4-A2HQ-01A	2	77	128	207	40725	535	40190	1647790	2295	2905	801	6001	488194	2320	3007	810	6137	488418	4989	3434	5674	14097	335462	4942	3529	5484	13955	335716	20	32	91	143	3573	0.00351136	0.0102472	0.0106429	0.96282	0.0400224	25	37	74	136	3573	0.00333947	0.00964744	0.010651	0.90578	0.0380633	0.00405157
Totals	24	2143	1514	3681	391752	4023	387729	15896889	11937	25625	6755	44317	4659669	11845	25376	6592	43813	4674572	48496	24023	76037	148556	3275976	49777	23827	77439	151043	3286655	137	279	2323	2739	41248	0.00699167	0.0181339	0.0125501	1.44492	0.0664032	172	314	2375	2861	41301	0.00730309	0.0192587	0.0126072	1.52759	0.0692719	0.0119923
[truncated: 12 more columns]

## Sheet: gCg_to_T_BRCA
Sample	A_T_coord_clusters	G_C_coord_clusters	Non_coord_clusters	clusters	mutations	complex	substitutions	bases	A_to_T	A_to_G	A_to_C	A	a	T_to_A	T_to_C	T_to_G	T	t	G_to_C	G_to_T	G_to_A	G	g	C_to_G	C_to_A	C_to_T	C	c	gCg_to_G	gCg_to_A	gCg_to_T	gCg	gcg	gCg_per_mut	gCg_per_C	gcg_per_c	enrich_gCg	freq_gCg	cGc_to_C	cGc_to_T	cGc_to_A	cGc	cgc	cGc_per_mut	cGc_per_G	cgc_per_g	enrich_cGc	freq_cGc	[gCg_to_T+revcomp]_per_mut
TCGA-A1-A0SM-01A	1	7	15	23	2066	39	2027	83107	109	204	71	384	24236	116	185	69	370	24422	88	159	400	647	17407	79	125	422	626	17042	3	1	48	52	304	0.0251694	0.0830671	0.0178383	4.65668	0.171053	2	3	36	41	265	0.0198451	0.0633694	0.0152238	4.16253	0.154717	0.0406583
TCGA-A2-A04P-01A	2	6	34	42	9416	245	9171	376011	702	747	474	1923	111583	761	731	407	1899	111882	742	932	959	2633	76080	802	891	1023	2716	76466	6	3	41	50	873	0.00531011	0.0184094	0.0114168	1.61248	0.0572738	5	7	50	62	861	0.00658454	0.0235473	0.011317	2.08069	0.0720093	0.0096644
TCGA-A2-A04Q-01A	3	8	32	43	936	54	882	36162	72	103	33	208	10866	46	77	43	166	11188	35	99	147	281	7020	40	53	134	227	7088	2	2	10	14	121	0.0149573	0.061674	0.0170711	3.61277	0.115702	0	2	10	12	103	0.0128205	0.0427046	0.0146724	2.91055	0.116505	0.0213675
TCGA-A2-A04T-01A	1	4	15	20	7959	147	7812	320292	562	593	352	1507	94571	591	592	313	1496	96338	709	811	897	2417	64411	702	761	929	2392	64972	13	3	55	71	694	0.00892072	0.0296823	0.0106815	2.77884	0.102305	8	8	53	69	696	0.00866943	0.0285478	0.0108056	2.64194	0.0991379	0.0135695
TCGA-A2-A04X-01A	1	26	25	52	3527	60	3467	142147	110	149	58	317	42145	122	126	49	297	42107	440	208	794	1442	29152	441	163	807	1411	28743	1	0	20	21	333	0.00595407	0.0148831	0.0115854	1.28464	0.0630631	1	0	33	34	359	0.00963992	0.0235784	0.0123148	1.91464	0.0947075	0.0150269
TCGA-A2-A0CM-01A	13	32	132	177	7801	367	7434	304794	421	592	279	1292	91817	377	549	274	1200	92265	513	548	1411	2472	59914	556	538	1376	2470	60798	7	7	60	74	715	0.00948596	0.0299595	0.0117603	2.54752	0.103497	4	8	81	93	772	0.0119215	0.0376214	0.0128851	2.91975	0.120466	0.0180746
TCGA-A2-A0D0-01A	9	5	33	47	7085	163	6922	283802	471	739	352	1562	85277	431	704	369	1504	85672	651	534	792	1977	56711	600	524	755	1879	56142	6	7	42	55	666	0.00776288	0.0292709	0.0118628	2.46746	0.0825826	16	7	55	78	652	0.0110092	0.0394537	0.0114969	3.43169	0.119632	0.0136909
TCGA-A2-A0D1-01A	0	14	53	67	4438	105	4333	177653	222	342	130	694	53473	221	340	130	691	52733	288	228	991	1507	35572	252	227	962	1441	35875	1	5	79	85	556	0.0191528	0.0589868	0.0154983	3.80603	0.152878	5	3	83	91	562	0.0205047	0.0603849	0.0157989	3.82208	0.161922	0.0365029
TCGA-A2-A0D2-01A	4	6	27	37	7373	108	7265	297865	462	598	308	1368	89217	436	641	328	1405	89105	841	588	848	2277	59812	804	559	852	2215	59731	6	2	35	43	655	0.00583209	0.0194131	0.0109658	1.77033	0.0656489	10	8	48	66	710	0.00895158	0.0289855	0.0118705	2.4418	0.0929577	0.0112573
TCGA-A2-A0D4-01A	6	8	50	64	3135	86	3049	125009	188	283	99	570	36994	175	290	115	580	37242	138	319	483	940	25279	156	332	471	959	25494	3	5	31	39	402	0.0124402	0.0406674	0.0157684	2.57904	0.0970149	2	2	51	55	467	0.0175439	0.0585106	0.0184738	3.16722	0.117773	0.0261563
TCGA-A2-A0EY-01A	0	83	79	162	15897	167	15730	644930	246	338	173	757	189990	253	360	171	784	189536	2058	949	3961	6968	133242	2134	931	4156	7221	132152	1	7	92	100	1531	0.0062905	0.0138485	0.0115851	1.19537	0.0653168	1	7	86	94	1483	0.00591307	0.0134902	0.0111301	1.21205	0.063385	0.0111971
TCGA-A2-A0YG-01A	1	14	27	42	3380	66	3314	135874	178	281	106	565	41177	175	291	113	579	41167	168	301	647	1116	26903	184	275	595	1054	26627	7	6	42	55	348	0.0162722	0.0521822	0.0130694	3.99269	0.158046	1	4	56	61	368	0.0180473	0.0546595	0.0136788	3.99594	0.165761	0.0289941
TCGA-A2-A259-01A	1	5	19	25	1542	49	1493	61213	99	145	54	298	18159	83	156	62	301	18481	43	118	251	412	12132	63	125	294	482	12441	1	3	34	38	193	0.0246433	0.0788382	0.0155132	5.082	0.196891	0	2	20	22	193	0.0142672	0.0533981	0.0159083	3.35661	0.11399	0.0350195
TCGA-A2-A25B-01A	0	11	56	67	6603	165	6438	263958	487	535	272	1294	78716	468	561	282	1311	78052	405	657	840	1902	53279	461	679	791	1931	53911	5	5	40	50	647	0.00757232	0.0258933	0.0120013	2.15755	0.0772798	7	8	45	60	655	0.00908678	0.0315457	0.0122938	2.56599	0.0916031	0.0128729
TCGA-A2-A3KC-01A	3	6	15	24	2425	36	2389	97949	136	223	75	434	29221	146	213	67	426	28723	55	274	439	768	20150	51	276	434	761	19855	0	8	32	40	324	0.0164948	0.0525624	0.0163183	3.22107	0.123457	0	6	32	38	327	0.0156701	0.0494792	0.0162283	3.04895	0.116208	0.0263918
TCGA-A2-A3XX-01A	4	4	35	43	2690	75	2615	107215	157	274	90	521	32481	187	264	87	538	33142	98	250	464	812	20799	110	223	411	744	20793	1	3	33	37	307	0.0137546	0.0497312	0.0147646	3.36828	0.120521	4	4	45	53	313	0.0197026	0.0652709	0.0150488	4.33728	0.169329	0.0289963
TCGA-A2-A3Y0-01A	1	4	35	40	10580	194	10386	425826	733	870	510	2113	125337	732	828	504	2064	125759	984	949	1156	3089	87469	1050	932	1138	3120	87261	9	6	63	78	1131	0.0073724	0.025	0.0129611	1.92885	0.0689655	7	8	66	81	1086	0.00765595	0.0262221	0.0124158	2.11199	0.0745856	0.0121928
TCGA-A7-A0CE-01A	2	6	28	36	8189	188	8001	328041	572	727	375	1674	97138	581	694	372	1647	97560	766	731	898	2395	66803	732	720	833	2285	66540	8	9	52	69	772	0.00842594	0.0301969	0.011602	2.60273	0.0893782	8	8	50	66	770	0.00805959	0.0275574	0.0115264	2.3908	0.0857143	0.0124557
TCGA-A7-A13D-01A	3	1	35	39	7427	159	7268	297988	470	644	326	1440	88244	465	676	307	1448	88543	731	608	959	2298	60709	660	546	876	2082	60492	5	6	56	67	883	0.00902114	0.0321806	0.014597	2.20461	0.0758777	16	2	69	87	906	0.011714	0.037859	0.0149237	2.53685	0.0960265	0.0168305
TCGA-A7-A26G-01A	2	5	17	24	3195	40	3155	129355	212	265	141	618	38720	176	238	153	567	39540	254	276	482	1012	25886	282	245	431	958	25209	5	2	29	36	319	0.0112676	0.0375783	0.0126542	2.96963	0.112853	2	3	26	31	303	0.00970266	0.0306324	0.0117052	2.617	0.10231	0.0172144
TCGA-A8-A075-01A	0	17	57	74	6823	144	6679	273839	421	432	243	1096	80624	437	382	232	1051	80964	537	583	1125	2245	56087	546	583	1158	2287	56164	1	1	38	40	639	0.00586252	0.0174902	0.0113774	1.53727	0.0625978	3	3	38	44	643	0.00644878	0.0195991	0.0114643	1.70957	0.0684292	0.0111388
TCGA-A8-A07B-01A	5	38	55	98	5993	135	5858	240178	275	455	144	874	70960	247	432	157	836	71690	604	322	1140	2066	48898	622	322	1138	2082	48630	3	2	78	83	681	0.0138495	0.0398655	0.0140037	2.84678	0.12188	2	7	77	86	665	0.0143501	0.0416263	0.0135997	3.06082	0.129323	0.0258635
TCGA-A8-A07I-01A	4	23	38	65	4784	91	4693	192413	254	372	133	759	55718	256	348	152	756	56675	261	352	981	1594	39843	230	366	988	1584	40177	2	2	98	102	660	0.0213211	0.0643939	0.0164273	3.91993	0.154545	2	7	110	119	736	0.0248746	0.074655	0.0184725	4.04141	0.161685	0.0434783
TCGA-A8-A08B-01A	1	15	49	65	3290	113	3177	130257	150	238	99	487	38464	175	240	83	498	39730	163	194	744	1101	25921	191	173	727	1091	26142	0	3	46	49	365	0.0148936	0.0449129	0.0139622	3.21675	0.134247	3	2	54	59	361	0.0179331	0.0535876	0.0139269	3.84777	0.163435	0.0303951
TCGA-A8-A08L-01A	3	17	119	139	20979	394	20585	843985	1434	1177	695	3306	249669	1290	1151	701	3142	250726	2135	1873	2990	6998	171546	2144	1932	3063	7139	172044	8	15	75	98	1803	0.00467134	0.0137274	0.0104799	1.30988	0.0543539	3	12	87	102	1818	0.004862	0.0145756	0.0105977	1.37535	0.0561056	0.00772201
TCGA-A8-A08S-01A	8	6	32	46	3985	98	3887	159367	262	388	122	772	47423	251	384	142	777	48162	145	337	697	1179	32052	140	294	725	1159	31730	2	1	70	73	486	0.0183187	0.0629853	0.0153167	4.11219	0.150206	1	6	72	79	476	0.0198243	0.0670059	0.0148509	4.51192	0.165966	0.0356336
TCGA-A8-A092-01A	3	65	68	136	7260	157	7103	291223	252	337	134	723	87251	216	281	149	646	87598	972	373	1464	2809	58059	1021	372	1532	2925	58315	2	6	59	67	723	0.00922865	0.022906	0.0123982	1.84753	0.0926694	2	4	64	70	711	0.00964187	0.0249199	0.0122462	2.03491	0.0984529	0.0169421
TCGA-A8-A094-01A	1	73	54	128	17340	144	17196	705036	492	854	359	1705	208824	492	916	365	1773	211369	2794	911	3088	6793	141804	2843	869	3213	6925	143031	4	4	79	87	1572	0.0050173	0.0125632	0.0109906	1.14308	0.0553435	1	8	76	85	1536	0.00490196	0.0125129	0.0108319	1.15519	0.0553385	0.00893887
TCGA-A8-A09I-01A	4	24	79	107	9010	161	8849	362809	444	547	241	1232	107377	442	522	240	1204	108206	704	697	1844	3245	73627	695	687	1786	3168	73599	3	10	119	132	970	0.0146504	0.0416667	0.0131795	3.16147	0.136082	10	9	104	123	1003	0.0136515	0.0379045	0.0136227	2.78244	0.122632	0.0247503
TCGA-A8-A09X-01A	2	11	26	39	3013	34	2979	122139	111	164	53	328	36528	89	170	43	302	36355	352	199	631	1182	24813	376	218	573	1167	24443	1	2	43	46	352	0.0152672	0.0394173	0.0144009	2.73715	0.130682	0	1	35	36	327	0.0119482	0.0304569	0.0131786	2.31109	0.110092	0.0258878
TCGA-AC-A2BK-01A	6	13	59	78	10235	422	9813	402333	892	885	392	2169	121789	845	793	460	2098	121461	596	958	1218	2772	79618	590	983	1201	2774	79465	5	12	93	110	1013	0.0107474	0.0396539	0.0127478	3.11066	0.108588	8	9	88	105	1044	0.0102589	0.0378788	0.0131126	2.88873	0.100575	0.0176844
TCGA-AN-A04D-01A	13	7	56	76	8292	239	8053	330173	622	825	407	1854	97283	614	777	386	1777	97609	643	653	916	2212	67585	596	681	933	2210	67696	10	7	64	81	941	0.00976845	0.0366516	0.0139004	2.63673	0.0860786	12	10	66	88	918	0.0106126	0.039783	0.0135829	2.9289	0.0958606	0.0156778
TCGA-AN-A0AT-01A	4	2	28	34	8801	144	8657	354937	656	705	392	1753	104173	607	649	373	1629	104555	779	836	1017	2632	73104	777	865	1001	2643	73105	8	10	64	82	944	0.00931712	0.0310253	0.0129129	2.40266	0.0868644	7	9	61	77	929	0.00874901	0.0292553	0.0127079	2.30213	0.0828848	0.0142029
TCGA-AN-A0XR-01A	1	3	27	31	3251	61	3190	130790	214	272	105	591	38115	173	248	93	514	38378	111	365	590	1066	27363	126	332	561	1019	26934	0	4	59	63	466	0.0193787	0.0618253	0.0173016	3.5734	0.135193	3	1	73	77	436	0.023685	0.0722326	0.0159339	4.53326	0.176606	0.0406029
TCGA-AO-A03L-01A	4	21	30	55	2102	55	2047	83927	123	156	66	345	25384	115	170	74	359	25353	109	231	323	663	16497	112	180	388	680	16693	0	4	32	36	249	0.0171265	0.0529412	0.0149164	3.54918	0.144578	2	3	29	34	250	0.0161751	0.0512821	0.0151543	3.384	0.136	0.02902
TCGA-AO-A03N-01B	1	53	45	99	7671	94	7577	310657	202	266	106	574	91783	190	285	112	587	92101	989	556	1772	3317	63663	967	531	1601	3099	63110	4	5	57	66	777	0.00860383	0.0212972	0.0123118	1.72981	0.0849421	3	3	74	80	752	0.0104289	0.0241182	0.0118122	2.0418	0.106383	0.0170773
TCGA-AO-A0J2-01A	3	8	21	32	7882	173	7709	316069	689	687	335	1711	93370	661	720	360	1741	94130	505	883	773	2161	64604	505	848	743	2096	63965	9	5	31	45	716	0.00570921	0.0214695	0.0111936	1.91801	0.0628492	8	7	44	59	799	0.00748541	0.0273022	0.0123677	2.20755	0.0738423	0.00951535
TCGA-AO-A0J4-01A	3	7	27	37	5906	129	5777	236857	349	422	250	1021	71446	424	425	234	1083	71125	619	486	754	1859	47118	670	488	656	1814	47164	4	1	31	36	490	0.0060955	0.0198456	0.0103893	1.9102	0.0734694	2	3	44	49	506	0.00829665	0.0263583	0.010739	2.45444	0.0968379	0.012699
TCGA-AO-A0J6-01A	1	6	44	51	10799	298	10501	430541	721	859	445	2025	129927	698	767	446	1911	130305	987	948	1320	3255	84654	1076	949	1285	3310	85655	11	8	50	69	869	0.00638948	0.0208459	0.0101454	2.05473	0.0794016	6	4	62	72	786	0.00666728	0.0221198	0.00928485	2.38235	0.0916031	0.0103713
TCGA-AO-A0JM-01A	4	7	25	36	3288	54	3234	132594	211	244	108	563	38913	172	237	98	507	39469	156	270	661	1087	27127	151	294	632	1077	27085	3	8	85	96	463	0.0291971	0.0891365	0.0170943	5.21439	0.207343	5	3	81	89	481	0.0270681	0.0818767	0.0177314	4.61761	0.185031	0.0504866
TCGA-AO-A124-01A	1	11	57	69	14769	412	14357	588637	1164	1237	712	3113	174877	1185	1190	671	3046	175052	1118	1502	1485	4105	119541	1161	1502	1430	4093	119167	22	9	64	95	1486	0.00643239	0.0232104	0.0124699	1.86131	0.06393	21	20	72	113	1466	0.00765116	0.0275274	0.0122636	2.24465	0.0770805	0.00920848
TCGA-AO-A12H-01A	1	4	15	20	2003	47	1956	80196	113	228	68	409	23876	108	217	82	407	23995	88	138	401	627	16129	80	128	305	513	16196	2	2	23	27	234	0.0134798	0.0526316	0.014448	3.64283	0.115385	3	3	30	36	276	0.017973	0.0574163	0.017112	3.35532	0.130435	0.0264603
TCGA-AQ-A04J-01A	3	3	33	39	4287	101	4186	171626	393	363	200	956	51876	324	365	166	855	52031	293	411	497	1201	34003	269	431	474	1174	33716	5	4	39	48	394	0.0111966	0.0408859	0.0116858	3.49875	0.121827	4	5	30	39	362	0.00909727	0.0324729	0.0106461	3.05021	0.107735	0.0160952
TCGA-AR-A0TX-01A	0	109	52	161	21455	132	21323	874243	180	282	115	577	263590	200	261	121	582	264515	4704	733	4609	10046	173454	4733	785	4600	10118	172684	1	2	33	36	1413	0.00167793	0.00355802	0.00818258	0.434828	0.0254777	2	5	33	40	1446	0.00186437	0.00398168	0.0083365	0.47762	0.0276625	0.00307621
TCGA-AR-A1AY-01A	2	6	32	40	4460	89	4371	179211	256	412	181	849	52618	278	410	188	876	53970	268	320	724	1312	36285	284	299	751	1334	36338	7	2	65	74	521	0.0165919	0.0554723	0.0143376	3.869	0.142035	2	4	58	64	557	0.0143498	0.0487805	0.0153507	3.17774	0.114901	0.0275785
TCGA-AR-A24Z-01A	3	11	79	93	3804	146	3658	149978	205	334	156	695	44608	221	352	146	719	44966	127	350	663	1140	30107	131	377	596	1104	30297	3	8	32	43	445	0.0113039	0.0389493	0.0146879	2.65179	0.0966292	2	8	62	72	501	0.0189274	0.0631579	0.0166406	3.7954	0.143713	0.0247108
TCGA-AR-A256-01A	3	5	51	59	16067	339	15728	644848	970	1229	873	3072	188628	955	1222	853	3030	188537	1621	1434	1748	4803	134130	1610	1441	1772	4823	133553	19	12	71	102	1673	0.00634842	0.0211487	0.0125269	1.68826	0.0609683	15	7	67	89	1709	0.0055393	0.0185301	0.0127414	1.45432	0.0520772	0.00858903
TCGA-AR-A2LK-01A	2	4	39	45	3437	114	3323	136243	223	305	109	637	39812	185	318	107	610	40643	130	210	704	1044	27863	124	207	701	1032	27925	3	3	68	74	505	0.0215304	0.0717054	0.0180842	3.9651	0.146535	1	3	82	86	500	0.0250218	0.0823755	0.0179449	4.59046	0.172	0.0436427
TCGA-B6-A0I1-01A	3	18	45	66	5988	142	5846	239686	400	536	194	1130	71616	390	555	229	1174	72253	388	490	940	1818	47962	397	462	865	1724	47855	4	7	76	87	740	0.0145291	0.050464	0.0154634	3.26345	0.117568	7	4	105	116	774	0.0193721	0.0638064	0.0161378	3.95385	0.149871	0.0302271
TCGA-B6-A0I2-01A	6	15	83	104	4387	134	4253	174373	216	370	174	760	50924	198	342	159	699	51418	414	306	721	1441	35918	404	299	650	1353	36113	4	5	45	54	530	0.0123091	0.0399113	0.0146762	2.71947	0.101887	3	3	43	49	518	0.0111694	0.0340042	0.0144217	2.35784	0.0945946	0.0200593
TCGA-B6-A0IJ-01A	4	6	101	111	11053	310	10743	440463	706	854	459	2019	130668	650	860	508	2018	130627	1148	865	1345	3358	89912	1130	910	1308	3348	89248	10	6	64	80	996	0.00723785	0.0238949	0.0111599	2.14113	0.0803213	13	5	55	73	963	0.00660454	0.0217391	0.0107105	2.02971	0.0758048	0.0107663
TCGA-B6-A0IQ-01A	9	18	96	123	4080	148	3932	161212	225	398	196	819	48427	263	375	171	809	49511	271	362	507	1140	31863	318	301	545	1164	31393	5	4	39	48	411	0.0117647	0.0412371	0.0130921	3.14977	0.116788	5	5	42	52	405	0.0127451	0.045614	0.0127107	3.58864	0.128395	0.0198529
TCGA-B6-A0RE-01A	2	7	22	31	7575	121	7454	305614	479	634	403	1516	90645	457	605	369	1431	91318	627	640	948	2215	61494	692	605	995	2292	62157	10	4	37	51	655	0.00673267	0.0222513	0.0105378	2.11156	0.0778626	6	1	53	60	640	0.00792079	0.027088	0.0104075	2.60274	0.09375	0.0118812
TCGA-B6-A0RT-01A	2	2	5	9	888	32	856	35096	80	95	36	211	10960	59	84	29	172	10353	53	84	120	257	6943	52	58	106	216	6840	3	2	4	9	104	0.0101351	0.0416667	0.0152047	2.74038	0.0865385	0	0	7	7	85	0.00788288	0.0272374	0.0122425	2.22481	0.0823529	0.0123874
TCGA-B6-A0RU-01A	2	6	27	35	3778	69	3709	152069	249	268	167	684	44433	242	285	167	694	45097	262	371	514	1147	31318	273	382	529	1184	31221	5	5	48	58	407	0.015352	0.0489865	0.0130361	3.75776	0.142506	2	4	38	44	399	0.0116464	0.0383609	0.0127403	3.011	0.110276	0.0227634
TCGA-B6-A0WX-01A	2	3	42	47	2917	85	2832	116112	193	252	116	561	34263	187	224	91	502	34533	131	309	466	906	23633	140	283	440	863	23683	1	3	46	50	369	0.0171409	0.0579374	0.0155808	3.71852	0.135501	6	6	45	57	369	0.0195406	0.0629139	0.0156138	4.02939	0.154472	0.0311964
TCGA-BH-A0AV-01A	0	8	21	29	5989	115	5874	240834	408	487	228	1123	70799	397	413	230	1040	71773	554	573	734	1861	48809	591	544	715	1850	49453	2	5	37	44	595	0.0073468	0.0237838	0.0120316	1.97677	0.0739496	9	3	42	54	658	0.00901653	0.0290167	0.0134811	2.15239	0.0820669	0.0131908
TCGA-BH-A0B3-01A	5	4	37	46	3473	157	3316	135956	237	314	151	702	41406	214	349	140	703	41699	213	265	560	1038	26686	187	204	482	873	26148	5	3	35	43	316	0.0123812	0.0492554	0.0120851	4.07573	0.136076	0	1	54	55	336	0.0158365	0.0529865	0.0125909	4.20833	0.16369	0.0256263
TCGA-BH-A0B9-01A	2	8	48	58	3200	99	3101	127141	211	279	122	612	37906	189	295	131	615	38798	229	307	463	999	25198	194	228	453	875	25239	0	4	42	46	347	0.014375	0.0525714	0.0137486	3.82378	0.132565	3	0	23	26	340	0.008125	0.026026	0.0134931	1.92883	0.0764706	0.0203125
TCGA-BH-A0BW-01A	5	6	61	72	8559	174	8385	343785	630	670	341	1641	101572	625	650	303	1578	102881	651	840	1149	2640	69761	634	797	1095	2526	69571	4	7	66	77	900	0.00899638	0.030483	0.0129364	2.35637	0.0855556	12	1	67	80	863	0.00934689	0.030303	0.0123708	2.44956	0.0926999	0.0155392
TCGA-BH-A0DG-01A	1	22	28	51	1728	44	1684	69044	106	116	54	276	20911	85	137	41	263	21358	106	155	323	584	13275	105	116	340	561	13500	1	3	20	24	173	0.0138889	0.0427807	0.0128148	3.33838	0.138728	2	1	16	19	177	0.0109954	0.0325342	0.0133333	2.44007	0.107345	0.0208333
TCGA-BH-A0DT-01A	1	0	4	5	1103	24	1079	44239	81	94	46	221	12883	71	113	48	232	13525	37	106	181	324	9068	36	89	177	302	8763	0	2	28	30	174	0.0271985	0.0993377	0.0198562	5.00285	0.172414	0	0	18	18	161	0.0163191	0.0555556	0.0177547	3.12905	0.111801	0.0417044
TCGA-BH-A0E0-01A	2	7	16	25	3439	88	3351	137391	252	272	222	746	41466	246	292	215	753	41031	170	256	511	937	27558	169	283	463	915	27336	1	4	40	45	375	0.0130852	0.0491803	0.0137182	3.58505	0.12	9	5	34	48	387	0.0139575	0.0512273	0.0140431	3.64786	0.124031	0.0215179
TCGA-BH-A0EA-01A	2	1	13	16	1455	40	1415	58015	92	160	56	308	17515	59	139	46	244	17269	45	104	302	451	11685	45	90	277	412	11546	0	2	15	17	163	0.0116838	0.0412621	0.0141174	2.92278	0.104294	1	2	21	24	170	0.0164948	0.0532151	0.0145486	3.65775	0.141176	0.0247423
TCGA-BH-A0H0-01A	2	9	16	27	2656	70	2586	106026	135	235	87	457	31494	179	211	91	481	31562	105	182	542	829	21478	106	157	556	819	21492	1	1	47	49	332	0.0184488	0.0598291	0.0154476	3.87303	0.14759	0	3	48	51	365	0.0192018	0.0615199	0.0169941	3.62007	0.139726	0.0357681
TCGA-BH-A0H6-01A	2	2	19	23	2236	48	2188	89708	138	166	63	367	25964	132	174	64	370	26833	69	162	506	737	18534	83	145	486	714	18377	1	3	51	55	371	0.0245975	0.0770308	0.0201883	3.81562	0.148248	1	1	52	54	343	0.0241503	0.07327	0.0185065	3.95914	0.157434	0.0460644
TCGA-BH-A0WA-01A	2	7	33	42	6046	112	5934	243294	489	507	246	1242	73303	478	472	256	1206	73885	461	495	787	1743	48075	460	553	730	1743	48031	5	2	42	49	511	0.00810453	0.0281124	0.010639	2.64241	0.0958904	3	4	46	53	533	0.00876613	0.0304073	0.0110868	2.74265	0.0994371	0.0145551
TCGA-BH-A18R-01A	0	7	17	24	3219	58	3161	129601	203	282	110	595	38867	206	267	132	605	39057	175	287	502	964	25943	181	302	514	997	25734	4	6	34	44	340	0.0136688	0.0441324	0.0132121	3.3403	0.129412	4	3	52	59	340	0.0183287	0.0612033	0.0131057	4.66999	0.173529	0.0267164
TCGA-BH-A18U-01A	3	17	34	54	5584	109	5475	224475	307	399	143	849	67567	293	389	150	832	68173	380	372	1195	1947	43954	449	335	1063	1847	44781	4	1	56	61	594	0.0109241	0.0330265	0.0132646	2.48983	0.102694	2	6	80	88	590	0.0157593	0.0451977	0.0134231	3.36716	0.149153	0.0243553
TCGA-BH-A1FC-01A	2	28	45	75	5522	92	5430	222630	234	380	194	808	65928	223	382	202	807	66428	646	362	841	1849	45042	719	342	905	1966	45232	7	4	58	69	620	0.0124955	0.0350966	0.0137071	2.56047	0.11129	6	3	56	65	658	0.0117711	0.0351541	0.0146086	2.4064	0.0987842	0.0206447
TCGA-C8-A12L-01A	5	13	126	144	7070	244	6826	279866	414	649	283	1346	81581	408	603	277	1288	83032	568	640	893	2101	57764	574	633	884	2091	57486	7	4	65	76	777	0.0107496	0.0363462	0.0135163	2.68906	0.0978121	6	10	68	84	749	0.0118812	0.039981	0.0129666	3.08339	0.11215	0.0188119
TCGA-C8-A12Q-01A	1	35	40	76	9740	94	9646	395486	228	328	158	714	117495	248	303	168	719	117311	1167	422	2422	4011	80244	1201	523	2478	4202	80436	1	2	57	60	815	0.00616016	0.0142789	0.0101323	1.40925	0.0736196	1	3	51	55	854	0.00564682	0.0137123	0.0106425	1.28844	0.0644028	0.0110883
TCGA-C8-A130-01A	2	30	105	137	3631	153	3478	142598	198	261	129	588	42338	210	238	117	565	43059	226	372	617	1215	28654	179	381	550	1110	28547	1	6	37	44	372	0.0121179	0.0396396	0.0130311	3.04192	0.11828	1	3	50	54	364	0.0148719	0.0444444	0.0127033	3.49866	0.148352	0.0239603
TCGA-D8-A27F-01A	2	7	24	33	8233	167	8066	330706	653	736	371	1760	98162	599	723	413	1735	97284	654	766	906	2326	67562	624	801	820	2245	67698	6	5	53	64	922	0.00777359	0.0285078	0.0136193	2.09319	0.0694143	4	3	56	63	915	0.00765213	0.0270851	0.0135431	1.99992	0.0688525	0.0132394
TCGA-D8-A27H-01A	5	12	42	59	9927	194	9733	399053	633	812	423	1868	118693	566	680	413	1659	118351	1151	799	1122	3072	80395	1187	777	1170	3134	81614	6	5	80	91	974	0.00916692	0.0290364	0.0119342	2.43303	0.0934292	6	5	57	68	1001	0.00685001	0.0221354	0.012451	1.7778	0.0679321	0.0138007
TCGA-E2-A109-01A	7	12	79	98	7787	118	7669	314429	690	600	257	1547	95656	750	515	266	1531	95000	359	905	1037	2301	61905	395	862	1033	2290	61868	1	6	74	81	742	0.010402	0.0353712	0.0119933	2.94925	0.109164	5	4	69	78	794	0.0100167	0.0338983	0.0128261	2.64292	0.0982368	0.0183639
TCGA-E2-A14P-01A	2	31	44	77	7112	110	7002	287082	373	397	184	954	85550	356	402	182	940	87234	484	561	1481	2526	56955	512	573	1497	2582	57343	1	4	84	89	711	0.0125141	0.0344694	0.0123991	2.78	0.125176	3	5	71	79	716	0.011108	0.0312747	0.0125713	2.48778	0.110335	0.0217942
TCGA-E2-A14X-01A	0	10	20	30	2020	35	1985	81385	116	180	59	355	24786	107	190	85	382	24635	96	182	353	631	16077	104	149	364	617	15887	1	5	33	39	252	0.0193069	0.0632091	0.015862	3.98493	0.154762	1	3	25	29	261	0.0143564	0.0459588	0.0162344	2.83096	0.111111	0.0287129
TCGA-E2-A152-01A	1	27	93	121	10069	224	9845	403645	192	364	146	702	122675	194	383	143	720	122409	1858	425	2000	4283	79254	1815	408	1917	4140	79307	6	3	45	54	778	0.005363	0.0130435	0.00980998	1.32961	0.0694087	0	4	52	56	747	0.00556162	0.0130749	0.00942539	1.3872	0.0749665	0.00963353
TCGA-E2-A156-01A	0	3	14	17	2021	47	1974	80934	128	195	71	394	23706	130	192	68	390	24087	72	151	365	588	16643	67	124	411	602	16498	0	4	31	35	269	0.0173182	0.0581395	0.016305	3.56575	0.130112	0	3	32	35	266	0.0173182	0.0595238	0.0159827	3.72427	0.131579	0.0311727
TCGA-E2-A15E-01A	2	6	35	43	2107	47	2060	84460	150	200	62	412	25795	153	175	80	408	25562	126	190	308	624	16448	105	184	327	616	16655	0	1	34	35	215	0.0166113	0.0568182	0.012909	4.40143	0.162791	3	0	18	21	265	0.00996678	0.0336538	0.0161114	2.08882	0.0792453	0.0246796
TCGA-E2-A15H-01A	1	3	22	26	1880	43	1837	75317	105	162	73	340	22546	118	173	66	357	22867	71	172	329	572	15000	78	135	355	568	14904	2	4	28	34	249	0.0180851	0.0598592	0.0167069	3.58289	0.136546	1	0	40	41	228	0.0218085	0.0716783	0.0152	4.71568	0.179825	0.0361702
TCGA-E2-A15K-01A	3	2	37	42	3718	66	3652	149732	221	279	105	605	45082	205	284	120	609	45570	145	456	660	1261	29783	140	411	626	1177	29297	1	2	41	44	366	0.0118343	0.0373832	0.0124927	2.99239	0.120219	2	5	31	38	385	0.0102205	0.0301348	0.0129268	2.33118	0.0987013	0.0193653
TCGA-E2-A1LG-01A	1	82	62	145	10286	129	10157	416437	213	317	122	652	123948	238	295	121	654	124231	2123	523	1866	4512	84278	2087	491	1761	4339	83980	1	4	42	47	967	0.00456932	0.010832	0.0115146	0.940714	0.0486039	4	3	46	53	997	0.00515263	0.0117465	0.0118299	0.992946	0.0531595	0.00855532
TCGA-E2-A1LK-01A	6	17	65	88	4265	156	4109	168469	265	396	156	817	49391	261	388	145	794	50206	174	263	835	1272	34521	156	242	828	1226	34351	0	3	115	118	700	0.0276671	0.096248	0.0203779	4.72316	0.168571	2	4	113	119	668	0.0279015	0.0935535	0.0193505	4.83467	0.178144	0.0534584
TCGA-E2-A1LL-01A	2	10	19	31	5455	71	5384	220744	382	476	487	1345	66743	387	486	493	1366	68035	244	460	628	1332	42901	275	450	616	1341	43065	2	1	37	40	454	0.00733272	0.0298285	0.0105422	2.82944	0.0881057	2	3	45	50	468	0.0091659	0.0375375	0.0109088	3.44102	0.106838	0.0150321
TCGA-E9-A1NH-01A	0	1	13	14	2170	44	2126	87166	124	220	61	405	26215	151	202	65	418	26218	68	180	387	635	17472	72	217	379	668	17261	1	2	33	36	236	0.0165899	0.0538922	0.0136724	3.94167	0.152542	0	2	25	27	220	0.0124424	0.0425197	0.0125916	3.37684	0.122727	0.0267281
TCGA-EW-A1J5-01A	0	181	101	282	37866	220	37646	1543486	173	237	104	514	454966	183	239	110	532	453080	6839	1542	10771	19152	318982	6183	1399	9866	17448	316458	3	3	65	71	3425	0.00187503	0.00406923	0.0108229	0.375983	0.0207299	2	8	74	84	3319	0.00221835	0.00438596	0.010405	0.421526	0.0253088	0.00367084
TCGA-EW-A1P8-01A	2	5	52	59	2966	87	2879	118039	158	253	114	525	35167	185	271	98	554	34980	213	233	462	908	24205	199	222	471	892	23687	5	7	50	62	415	0.0209036	0.0695067	0.0175202	3.96724	0.149398	3	3	41	47	395	0.0158463	0.0517621	0.0163189	3.1719	0.118987	0.0306811
TCGA-EW-A1PB-01A	1	11	33	45	12429	175	12254	502414	462	603	344	1409	148783	511	616	360	1487	149835	1889	819	1848	4556	101100	1997	818	1987	4802	102696	3	5	38	46	1065	0.00370102	0.00957934	0.0103704	0.923718	0.0431925	8	4	44	56	1120	0.00450559	0.0122915	0.0110781	1.10953	0.05	0.00659747
TCGA-EW-A1PC-01B	8	12	73	93	13260	238	13022	533902	758	1233	1615	3606	164433	763	1191	1559	3513	164505	488	843	1562	2893	102561	504	845	1661	3010	102403	5	9	87	101	975	0.00761689	0.0335548	0.00952121	3.52422	0.10359	2	7	87	96	1015	0.00723982	0.0331835	0.00989655	3.35304	0.0945813	0.0131222
TCGA-EW-A1PH-01A	4	21	80	105	5423	193	5230	214430	283	549	237	1069	64583	301	539	222	1062	65411	397	353	831	1581	42261	415	342	761	1518	42175	7	4	57	68	611	0.0125392	0.0447958	0.0144873	3.09208	0.111293	3	5	75	83	560	0.0153052	0.0524984	0.013251	3.96185	0.148214	0.0243408
TCGA-EW-A3U0-01A	0	10	21	31	10908	160	10748	440668	995	778	460	2233	131954	936	813	452	2201	131350	819	1204	1135	3158	88719	865	1221	1070	3156	88645	8	10	44	62	953	0.0056839	0.0196451	0.0107507	1.82733	0.0650577	11	6	46	63	933	0.00577558	0.0199493	0.0105163	1.89698	0.0675241	0.00825083
TCGA-GI-A2C9-01A	2	4	39	45	8852	191	8661	355101	767	760	371	1898	105214	741	695	363	1799	105540	618	934	937	2489	72203	613	915	947	2475	72144	7	8	49	64	937	0.00723	0.0258586	0.0129879	1.99097	0.0683031	6	9	63	78	913	0.00881157	0.0313379	0.0126449	2.4783	0.0854326	0.0126525
TCGA-GM-A2DF-01A	1	16	11	28	1293	32	1261	51701	61	122	47	230	15525	68	103	48	219	15936	84	132	219	435	10140	107	103	167	377	10096	2	2	12	16	156	0.0123743	0.0424403	0.0154517	2.74665	0.102564	1	2	13	16	156	0.0123743	0.0367816	0.0153846	2.3908	0.102564	0.0193349
TCGA-GM-A3XL-01A	0	2	23	25	7109	79	7030	288230	372	497	274	1143	85229	381	515	318	1214	84542	928	493	928	2349	59746	841	555	928	2324	58713	8	2	42	52	750	0.00731467	0.0223752	0.012774	1.75162	0.0693333	4	4	39	47	766	0.00661134	0.0200085	0.0128209	1.56061	0.0613577	0.011394
Totals	260	1588	4145	5993	629122	12621	616501	25276541	34072	42699	22042	98813	7520001	33385	41575	21973	96933	7552779	61513	48577	101757	211847	5104107	61589	47528	99791	208908	5099582	394	436	4823	5653	62733	0.00898554	0.0270598	0.0123016	2.19969	0.0901121	407	435	5096	5938	62994	0.00943855	0.0280297	0.0123418	2.27111	0.0942629	0.0157664
[truncated: 12 more columns]

## Sheet: gCg_to_T_CRC
Sample	A_T_coord_clusters	G_C_coord_clusters	Non_coord_clusters	clusters	mutations	complex	substitutions	bases	A_to_T	A_to_G	A_to_C	A	a	T_to_A	T_to_C	T_to_G	T	t	G_to_C	G_to_T	G_to_A	G	g	C_to_G	C_to_A	C_to_T	C	c	gCg_to_G	gCg_to_A	gCg_to_T	gCg	gcg	gCg_per_mut	gCg_per_C	gcg_per_c	enrich_gCg	freq_gCg	cGc_to_C	cGc_to_T	cGc_to_A	cGc	cgc	cGc_per_mut	cGc_per_G	cgc_per_g	enrich_cGc	freq_cGc	[gCg_to_T+revcomp]_per_mut
TCGA-A6-2680-01A	1	4	30	35	9965	112	9853	403973	331	559	194	1084	118720	293	594	229	1116	119260	189	1850	1862	3901	82706	186	1855	1711	3752	83287	3	11	282	296	1617	0.029704	0.0788913	0.0194148	4.06346	0.183055	1	10	332	343	1631	0.0344205	0.0879262	0.0197205	4.45863	0.2103	0.0616157
TCGA-A6-2681-01A	1	2	22	25	11912	130	11782	483062	630	885	612	2127	141584	611	869	602	2082	142531	332	1261	2269	3862	99288	347	1280	2084	3711	99653	3	7	341	351	1856	0.0294661	0.0945837	0.0186246	5.07842	0.189116	2	11	367	380	1873	0.0319006	0.0983946	0.0188643	5.21591	0.202883	0.0594359
TCGA-A6-2683-01A	7	2	42	51	20697	233	20464	839024	975	1784	2202	4961	254453	1009	1678	2227	4914	254968	575	2124	2718	5417	165440	527	2069	2576	5172	164163	6	19	429	454	2455	0.0219355	0.0877804	0.0149546	5.86977	0.184929	6	18	431	455	2422	0.0219839	0.0839948	0.0146397	5.73745	0.187861	0.0415519
TCGA-A6-3807-01A	3	4	25	32	6470	73	6397	262277	375	532	289	1196	79053	351	575	316	1242	78482	271	681	1073	2025	52385	268	634	1032	1934	52357	6	4	113	123	775	0.0190108	0.0635988	0.0148022	4.29657	0.15871	2	8	156	166	791	0.0256569	0.0819753	0.0150997	5.42892	0.209861	0.0415765
TCGA-A6-6141-01A	0	2	655	657	188417	295	188122	7713002	1871	6922	19172	27965	2519708	1953	6981	19455	28389	2527194	222	43725	22231	66178	1333959	198	43515	21877	65590	1332141	0	11	2001	2012	11739	0.0106784	0.0306754	0.00881213	3.48104	0.171394	1	19	2040	2060	11648	0.0109332	0.0311282	0.0087319	3.56488	0.176854	0.0214471
TCGA-A6-6781-01A	1	5	116	122	93282	1121	92161	3778601	2726	9929	1670	14325	1067053	2786	9804	1949	14539	1073083	629	5297	26040	31966	819364	647	5294	25390	31331	819090	4	14	4024	4042	19411	0.043331	0.12901	0.0236983	5.44385	0.208232	5	23	4186	4214	19355	0.0451748	0.131828	0.023622	5.58072	0.217722	0.0880127
TCGA-AA-3514-01A	1	1	39	41	12018	193	11825	484825	473	771	329	1573	142495	464	867	317	1648	141929	296	1540	2487	4323	100037	277	1521	2483	4281	100364	4	16	395	415	2168	0.0345315	0.09694	0.0216014	4.48768	0.191421	3	24	461	488	2230	0.0406058	0.112885	0.0222918	5.06396	0.218834	0.0712265
TCGA-AA-3516-01A	3	1	291	295	134749	1684	133065	5455665	5339	18739	7650	31728	1601042	5224	19031	8132	32387	1602267	2033	8550	24095	34678	1128947	2059	8558	23655	34272	1123409	17	80	4221	4318	20310	0.0320448	0.125992	0.0180789	6.96901	0.212605	18	67	4372	4457	20483	0.0330763	0.128525	0.0181435	7.08384	0.217595	0.0637704
TCGA-AA-3518-01A	3	1	94	98	67947	596	67351	2761391	2212	8407	2870	13489	791638	2256	8656	3219	14131	794314	642	6396	13022	20060	588600	630	6302	12739	19671	586835	6	60	2374	2440	10806	0.0359103	0.12404	0.018414	6.73619	0.2258	9	75	2426	2510	10814	0.0369406	0.125125	0.0183724	6.81046	0.232107	0.0706433
TCGA-AA-3529-01A	2	5	34	41	14399	165	14234	583594	872	1240	652	2764	176947	854	1199	683	2736	179392	642	1617	2209	4468	113950	584	1551	2131	4266	113305	6	13	282	301	1649	0.0209042	0.0705579	0.0145536	4.84813	0.182535	3	13	319	335	1710	0.0232655	0.0749776	0.0150066	4.99632	0.195906	0.041739
TCGA-AA-3534-01A	2	0	29	31	10866	107	10759	441119	395	707	267	1369	127774	424	671	283	1378	129136	325	1392	2306	4023	92036	331	1343	2315	3989	92169	2	11	371	384	1822	0.0353396	0.0962647	0.019768	4.86972	0.210757	3	16	420	439	1887	0.0404013	0.109123	0.0205028	5.32231	0.232644	0.0727959
TCGA-AA-3555-01A	0	4	1206	1210	234788	428	234360	9608760	2359	10035	20959	33353	3115396	2271	10131	21211	33613	3123549	393	53216	30590	84199	1684419	372	53084	29739	83195	1685395	1	18	3116	3135	15709	0.0133525	0.0376826	0.00932066	4.0429	0.199567	2	24	3272	3298	15831	0.0140467	0.0391691	0.00939849	4.16759	0.208325	0.0272075
TCGA-AA-3664-01A	2	3	35	40	16990	222	16768	687488	724	1032	704	2460	203510	788	1113	741	2642	204410	378	2263	3206	5847	139445	367	2243	3209	5819	140123	1	16	469	486	2579	0.0286051	0.0835195	0.0184053	4.53781	0.188445	0	29	494	523	2531	0.0307828	0.0894476	0.0181505	4.9281	0.206638	0.0566804
TCGA-AA-3666-01A	6	1	46	53	21684	191	21493	881213	1323	1712	2442	5477	267745	1337	1785	2532	5654	269485	1235	1637	2378	5250	171941	1168	1564	2380	5112	172026	7	8	303	318	1983	0.0146652	0.0622066	0.0115273	5.39644	0.160363	4	10	306	320	2044	0.0147574	0.0609524	0.0118878	5.12731	0.156556	0.0280852
TCGA-AA-3956-01A	0	4	25	29	12027	145	11882	487162	733	958	564	2255	150320	717	1048	537	2302	151025	469	1297	2046	3812	92855	457	1244	1812	3513	92962	3	12	316	331	1471	0.0275214	0.0942215	0.0158237	5.95446	0.225017	3	14	304	321	1416	0.0266899	0.0842078	0.0152496	5.52197	0.226695	0.0515507
TCGA-AA-3977-01A	0	0	1823	1823	695076	3206	691870	28366670	6848	41973	63080	111901	9195934	6676	42095	63529	112300	9202929	918	154655	78549	234122	4982817	931	156133	76483	233547	4984976	5	37	8296	8338	43805	0.0119958	0.0357016	0.0087874	4.06281	0.190344	2	36	8638	8676	43879	0.0124821	0.0370576	0.00880606	4.20819	0.197726	0.0243628
TCGA-AA-3994-01A	2	3	40	45	16446	187	16259	666619	667	916	440	2023	199231	690	970	452	2112	198851	258	2822	3081	6161	134598	299	2817	2847	5963	133939	5	18	474	497	2514	0.0302201	0.0833473	0.0187697	4.44052	0.197693	4	26	542	572	2543	0.0347805	0.0928421	0.0188933	4.91402	0.224931	0.0617779
TCGA-AA-A01R-01A	5	1	180	186	119198	1289	117909	4834269	4245	14763	4020	23028	1381651	4387	15006	4070	23463	1385631	944	6524	28726	36194	1034081	957	6614	27653	35224	1032906	10	40	5281	5331	24569	0.0447239	0.151346	0.0237863	6.36273	0.216981	10	52	5436	5498	24514	0.0461249	0.151904	0.0237061	6.40779	0.22428	0.0899092
TCGA-AA-A01S-01A	3	3	54	60	7224	125	7099	291059	359	522	197	1078	87511	337	567	223	1127	87200	212	903	1399	2514	58412	181	872	1327	2380	57927	3	9	199	211	1120	0.0292082	0.0886555	0.0193347	4.58531	0.188393	1	11	237	249	1134	0.0344684	0.0990453	0.0194138	5.1018	0.219577	0.0603544
TCGA-AA-A01T-01A	9	5	39	53	10655	246	10409	426769	699	781	460	1940	129719	673	767	481	1921	129485	496	1089	1735	3320	84086	508	1075	1645	3228	83477	5	8	202	215	1317	0.0201783	0.0666047	0.0157768	4.22169	0.16325	2	10	242	254	1353	0.0238386	0.076506	0.0160907	4.75468	0.187731	0.0416706
TCGA-AA-A01V-01A	7	1	48	56	16543	186	16357	670637	841	1545	1659	4045	207226	817	1537	1527	3881	210182	610	1664	1910	4184	126615	557	1677	2013	4247	126614	2	17	238	257	1328	0.0155353	0.0605133	0.0104886	5.76945	0.193524	2	15	250	267	1316	0.0161398	0.0638145	0.0103937	6.13972	0.202888	0.0294989
TCGA-AA-A01X-01A	5	3	27	35	8494	96	8398	344318	450	662	272	1384	105277	474	722	342	1538	105940	267	874	1642	2783	66686	222	892	1579	2693	66415	0	4	218	222	991	0.0261361	0.0824359	0.0149213	5.52471	0.224016	2	6	246	254	1012	0.0299035	0.0912684	0.0151756	6.01416	0.250988	0.0546268
TCGA-AA-A02O-01A	4	6	36	46	19775	220	19555	801755	1025	1485	1391	3901	249075	1024	1481	1335	3840	249660	831	2266	2833	5930	152161	755	2320	2809	5884	150859	2	9	433	444	1849	0.0224526	0.0754589	0.0122565	6.15665	0.24013	1	21	406	428	1840	0.0216435	0.0721754	0.0120925	5.96863	0.232609	0.0424273
TCGA-AA-A03F-01A	1	1	34	36	12891	114	12777	523857	638	1057	743	2438	161944	606	1075	711	2392	162396	393	1487	2146	4026	99514	363	1453	2105	3921	100003	3	6	309	318	1251	0.0246684	0.0811018	0.0125096	6.48315	0.254197	3	9	300	312	1271	0.0242029	0.0774963	0.0127721	6.06764	0.245476	0.0472423
TCGA-AD-6964-01A	1	0	90	91	78811	601	78210	3206610	3174	12419	1306	16899	942699	3088	12173	1480	16741	945845	491	3845	17982	22318	659266	510	3876	17866	22252	658800	7	28	1867	1902	11083	0.0241337	0.0854755	0.016823	5.08087	0.171614	4	27	1891	1922	11211	0.0243875	0.0861188	0.0170053	5.06424	0.171439	0.0476837
TCGA-AF-2691-01A	0	1	17	18	13571	107	13464	552024	748	945	305	1998	155810	737	982	327	2046	157114	485	2208	1865	4558	118865	574	2430	1858	4862	120235	5	9	184	198	1647	0.0145899	0.040724	0.0136982	2.97295	0.120219	3	16	190	209	1686	0.0154005	0.0458534	0.0141842	3.23272	0.123962	0.0275588
TCGA-AF-3913-01A	3	5	35	43	12323	251	12072	494952	816	977	679	2472	149126	775	934	644	2353	149813	782	1012	1898	3692	98276	776	1026	1753	3555	97726	4	12	219	235	1430	0.01907	0.0661041	0.0146327	4.51754	0.164336	6	8	230	244	1398	0.0198004	0.0660888	0.0142252	4.64588	0.174535	0.0364359
TCGA-AG-3574-01A	1	1	23	25	9178	95	9083	372403	416	623	228	1267	113682	408	681	268	1357	115372	205	1161	1925	3291	71807	180	1148	1840	3168	71542	1	7	263	271	1029	0.0295271	0.0855429	0.0143832	5.94744	0.263362	1	12	253	266	1035	0.0289823	0.0808265	0.0144136	5.60764	0.257005	0.0562214
TCGA-AG-3593-01A	2	2	37	41	16899	386	16513	677033	1180	1450	1174	3804	206583	1124	1507	1262	3893	205674	1099	1296	2044	4439	132670	1086	1297	1994	4377	132106	4	11	277	292	1818	0.0172791	0.0667124	0.0137617	4.84769	0.160616	4	10	223	237	1716	0.0140245	0.0533904	0.0129343	4.1278	0.138112	0.0295875
TCGA-AG-3727-01A	2	5	32	39	11062	107	10955	449155	597	992	385	1974	134780	592	961	443	1996	135120	271	1239	2062	3572	89207	244	1180	1989	3413	90048	2	10	372	384	1728	0.0347134	0.112511	0.0191898	5.86307	0.222222	4	13	313	330	1664	0.0298319	0.0923852	0.0186532	4.95277	0.198317	0.0619237
TCGA-AG-3885-01A	4	7	20	31	9904	132	9772	400652	653	975	376	2004	123835	651	981	389	2021	125930	230	1021	1695	2946	75795	191	995	1615	2801	75092	3	7	236	246	1135	0.0248384	0.0878258	0.0151148	5.81058	0.21674	1	5	257	263	1060	0.0265549	0.0892736	0.0139851	6.38348	0.248113	0.0497779
TCGA-AG-3890-01A	0	10	31	41	10029	323	9706	397946	643	890	486	2019	118415	637	875	496	2008	120080	488	995	1400	2883	79700	554	859	1383	2796	79713	2	9	169	180	1137	0.017948	0.0643777	0.0142637	4.5134	0.158311	2	5	192	199	1188	0.0198425	0.0690253	0.0149059	4.63074	0.167508	0.0359956
TCGA-AG-3896-01A	5	7	30	42	10635	121	10514	431074	477	725	344	1546	126320	525	777	371	1673	127075	403	987	2249	3639	88538	395	1015	2246	3656	89141	3	14	354	371	1816	0.0348848	0.101477	0.0203722	4.98115	0.204295	2	10	427	439	1906	0.0412788	0.120638	0.0215275	5.60389	0.230325	0.0734368
TCGA-AG-3901-01A	4	5	16	25	6172	75	6097	249977	279	433	182	894	73410	294	454	199	947	74330	168	659	1276	2103	51236	191	598	1364	2153	51001	2	4	207	213	910	0.0345107	0.0989317	0.0178428	5.54463	0.234066	1	10	195	206	946	0.0333765	0.0979553	0.0184636	5.30533	0.217759	0.0651329
TCGA-AG-4007-01A	8	4	52	64	16071	221	15850	649850	847	1219	539	2605	192760	939	1282	534	2755	194805	547	1866	2964	5377	131057	540	1810	2763	5113	131228	2	11	419	432	2378	0.0268807	0.0844905	0.0181211	4.66254	0.181665	6	23	490	519	2375	0.0322942	0.0965222	0.0181219	5.32628	0.218526	0.0565615
TCGA-AG-4008-01A	4	5	34	43	10310	100	10210	418610	559	784	512	1855	127518	549	790	574	1913	127779	295	1209	1762	3266	82135	254	1235	1687	3176	81177	2	11	267	280	1393	0.0271581	0.0881612	0.01716	5.13759	0.201005	2	9	274	285	1416	0.0276431	0.0872627	0.0172399	5.06167	0.201271	0.0524733
TCGA-AG-4015-01A	5	17	52	74	11212	150	11062	453542	586	849	419	1854	134837	625	894	444	1963	138037	407	1089	2139	3635	90057	375	1168	2067	3610	90611	4	8	290	302	1568	0.0269354	0.0836565	0.0173047	4.83431	0.192602	3	8	309	320	1561	0.0285408	0.088033	0.0173335	5.07879	0.204997	0.0534249
TCGA-AG-A032-01A	3	3	44	50	6513	117	6396	262236	268	467	229	964	77972	290	433	209	932	77929	197	820	1351	2368	53145	183	761	1188	2132	53190	2	4	182	188	957	0.0288653	0.0881801	0.0179921	4.90105	0.196447	4	8	195	207	977	0.0317826	0.0874155	0.0183837	4.75507	0.211873	0.0578842
TCGA-AZ-6601-01A	0	2	91	93	100663	607	100056	4102296	2867	10645	2049	15561	1159564	2891	10347	2115	15353	1157306	691	6708	27489	34888	892272	687	6609	26958	34254	893154	5	26	4757	4788	20606	0.0475646	0.139779	0.023071	6.05864	0.23236	10	37	4871	4918	20800	0.0488561	0.140965	0.0233113	6.04709	0.236442	0.0956459
TCGA-CA-6717-01A	0	0	1832	1832	990101	6149	983952	40342032	10484	59011	124933	194428	13169100	10240	59406	126169	195815	13196304	1226	203599	92342	297167	6986917	1267	204846	90429	296542	6989704	1	47	5591	5639	49307	0.00569538	0.0190159	0.00705423	2.69567	0.114365	3	57	5842	5902	49586	0.00596101	0.0198609	0.00709698	2.7985	0.119026	0.0115473
TCGA-CA-6718-01A	0	1	2432	2433	691071	3053	688018	28208738	5991	31662	96486	134139	9307175	6006	31618	97435	135059	9316211	757	152027	57083	209867	4793238	757	152586	55610	208953	4792089	2	35	3624	3661	32964	0.00529757	0.0175207	0.00687884	2.54704	0.111061	1	37	3628	3666	32529	0.00530481	0.0174682	0.00678644	2.57399	0.112699	0.0104939
TCGA-EI-6917-01A	0	1	1736	1737	709121	2977	706144	28951904	4500	36710	49606	90816	9092645	4551	36738	50590	91879	9092272	739	119635	143023	263397	5385389	762	119951	139339	260052	5381598	3	40	13600	13643	67339	0.0192393	0.0524626	0.0125128	4.1927	0.202602	2	40	14008	14050	66960	0.0198133	0.0533415	0.0124336	4.2901	0.209827	0.0389327
Totals	110	138	11574	11822	4476159	26936	4449223	182418143	72195	289692	413076	774963	57881237	71944	291055	419052	782051	57980295	23041	806506	623102	1452649	33283912	22717	809300	607543	1439560	33272550	158	741	67565	68464	375339	0.0152953	0.047559	0.0112807	4.21594	0.182406	148	882	69971	71001	375542	0.015862	0.0488769	0.011283	4.33191	0.189063	0.0307263
[truncated: 12 more columns]

## Sheet: gCg_to_T_GBM
Sample	A_T_coord_clusters	G_C_coord_clusters	Non_coord_clusters	clusters	mutations	complex	substitutions	bases	A_to_T	A_to_G	A_to_C	A	a	T_to_A	T_to_C	T_to_G	T	t	G_to_C	G_to_T	G_to_A	G	g	C_to_G	C_to_A	C_to_T	C	c	gCg_to_G	gCg_to_A	gCg_to_T	gCg	gcg	gCg_per_mut	gCg_per_C	gcg_per_c	enrich_gCg	freq_gCg	cGc_to_C	cGc_to_T	cGc_to_A	cGc	cgc	cGc_per_mut	cGc_per_G	cgc_per_g	enrich_cGc	freq_cGc	[gCg_to_T+revcomp]_per_mut
TCGA-02-2483-01A	4	7	39	50	4027	73	3954	162114	179	626	121	926	47723	217	590	118	925	48051	194	225	612	1031	32737	192	277	603	1072	33603	1	6	80	87	486	0.0216042	0.0811567	0.014463	5.61134	0.179012	1	1	89	91	508	0.0225975	0.0882638	0.0155176	5.68798	0.179134	0.0419667
TCGA-02-2485-01A	8	5	42	55	6282	45	6237	255717	346	451	128	925	74757	339	495	150	984	75036	173	443	1610	2226	53475	158	440	1504	2102	52449	1	0	227	228	1046	0.0362942	0.108468	0.0199432	5.43886	0.217973	4	1	203	208	1029	0.0331105	0.0934412	0.0192426	4.85594	0.202138	0.0684495
TCGA-06-0125-01A	2	8	47	57	8958	57	8901	364941	433	651	225	1309	105456	500	646	216	1362	106460	313	564	2242	3119	77125	274	551	2286	3111	75900	2	3	329	334	1614	0.0372851	0.107361	0.0212648	5.04876	0.206939	2	3	338	343	1592	0.0382898	0.109971	0.0206418	5.32759	0.215452	0.0744586
TCGA-06-0157-01A	5	5	41	51	5121	55	5066	207706	316	427	127	870	60203	266	386	136	788	61016	131	336	1224	1691	43387	151	341	1225	1717	43100	1	3	162	166	847	0.0324155	0.0966803	0.019652	4.91962	0.195986	0	0	169	169	852	0.0330014	0.0999409	0.0196372	5.08936	0.198357	0.0646358
TCGA-06-0190-01A	2	19	32	53	5427	40	5387	220867	237	349	114	700	64201	252	413	153	818	65168	194	310	1464	1968	45627	162	290	1449	1901	45871	0	1	213	214	1017	0.0394325	0.112572	0.0221709	5.07749	0.210423	1	4	202	207	980	0.0381426	0.105183	0.0214785	4.89712	0.211224	0.0764695
TCGA-06-0686-01A	5	7	44	56	6700	47	6653	272773	422	514	163	1099	78896	408	471	168	1047	79073	193	512	1577	2282	57302	207	486	1532	2225	57502	0	5	193	198	1123	0.0295522	0.0889888	0.0195298	4.55657	0.176313	1	4	200	205	1099	0.030597	0.0898335	0.0191791	4.68393	0.186533	0.0586567
TCGA-06-0744-01A	4	8	47	59	10402	82	10320	423120	668	839	262	1769	123345	691	750	222	1663	123521	319	784	2458	3561	88198	292	741	2294	3327	88056	1	5	339	345	1749	0.0331667	0.103697	0.0198624	5.22078	0.197256	2	4	364	370	1688	0.0355701	0.103903	0.0191388	5.42895	0.219194	0.0675832
TCGA-06-0745-01A	4	15	68	87	7155	119	7036	288476	527	566	224	1317	84994	509	594	226	1329	84849	290	651	1321	2262	59292	295	622	1211	2128	59341	2	3	154	159	993	0.0222222	0.074718	0.0167338	4.4651	0.160121	3	9	166	178	980	0.0248777	0.0786914	0.0165284	4.76099	0.181633	0.044724
TCGA-06-2557-01A	5	9	58	72	5582	77	5505	225705	242	493	145	880	64181	217	446	160	823	65258	175	298	1428	1901	48126	171	289	1441	1901	48140	0	5	207	212	1052	0.0379792	0.11152	0.0218529	5.10322	0.201521	3	1	213	217	1088	0.038875	0.11415	0.0226073	5.04927	0.199449	0.0752418
TCGA-06-2570-01A	4	14	43	61	3204	52	3152	129232	192	407	95	694	38776	195	385	89	669	38345	132	236	549	917	26096	128	211	533	872	26015	3	0	49	52	367	0.0162297	0.059633	0.0141072	4.22712	0.141689	0	2	61	63	379	0.0196629	0.0687023	0.0145233	4.73049	0.166227	0.0343321
TCGA-06-5411-01A	2	5	34	41	3911	40	3871	158711	248	391	106	745	47071	225	356	93	674	48195	126	259	878	1263	31693	124	306	759	1189	31752	0	4	89	93	469	0.0237791	0.078217	0.0147707	5.29541	0.198294	0	1	103	104	470	0.0265917	0.0823436	0.0148298	5.55259	0.221277	0.0490923
TCGA-06-5415-01A	4	2	30	36	4932	47	4885	200285	234	368	116	718	58206	280	363	127	770	58995	132	309	1287	1728	41305	155	280	1234	1669	41779	2	2	206	210	880	0.0425791	0.125824	0.0210632	5.97363	0.238636	5	1	185	191	873	0.0387267	0.110532	0.0211355	5.22971	0.218786	0.0792782
TCGA-14-1034-01A	4	4	39	47	7558	40	7518	308238	376	524	145	1045	88879	365	498	171	1034	90216	227	439	2121	2787	64014	191	479	1982	2652	65129	1	7	269	277	1291	0.0366499	0.104449	0.0198222	5.26932	0.214562	5	4	289	298	1302	0.0394284	0.106925	0.0203393	5.25706	0.228879	0.0738291
TCGA-14-1823-01A	4	0	37	41	4210	61	4149	170109	283	345	123	751	49432	257	332	92	681	48822	140	386	842	1368	35586	147	365	837	1349	36269	0	3	97	100	623	0.023753	0.074129	0.0171772	4.31554	0.160514	2	2	111	115	668	0.0273159	0.0840643	0.0187714	4.47831	0.172156	0.0494062
TCGA-14-2554-01A	3	5	44	52	9691	67	9624	394584	771	733	273	1777	116981	754	684	261	1699	117366	310	906	1880	3096	79607	368	878	1806	3052	80630	3	5	205	213	1306	0.0219792	0.0697903	0.0161974	4.30872	0.163093	2	3	274	279	1356	0.0287896	0.0901163	0.0170337	5.29048	0.205752	0.0494273
TCGA-15-1444-01A	2	2	30	34	2057	49	2008	82328	116	299	76	491	24905	104	318	80	502	24448	111	123	288	522	16541	87	120	286	493	16434	0	2	26	28	213	0.0136121	0.0567951	0.0129609	4.38202	0.131455	0	0	37	37	235	0.0179874	0.0708812	0.0142071	4.98913	0.157447	0.0306271
TCGA-19-2620-01A	7	5	39	51	7497	55	7442	305122	460	568	187	1215	88216	457	634	185	1276	88737	228	542	1755	2525	64301	224	526	1676	2426	63868	1	4	238	243	1295	0.032413	0.100165	0.0202762	4.94002	0.187645	2	4	255	261	1280	0.0348139	0.103366	0.0199064	5.19262	0.203906	0.0657596
TCGA-19-2624-01A	4	7	40	51	4149	62	4087	167567	180	323	101	604	48724	189	327	94	610	48667	124	241	1054	1419	35185	117	262	1075	1454	34991	4	2	181	187	766	0.0450711	0.128611	0.0218913	5.87496	0.244125	2	0	139	141	697	0.0339841	0.0993658	0.0198096	5.01605	0.202296	0.077127
TCGA-19-2629-01A	9	7	41	57	5606	65	5541	227181	240	928	212	1380	68038	261	975	200	1436	68099	325	282	792	1399	45623	296	270	760	1326	45417	1	1	153	155	683	0.0276489	0.116893	0.0150384	7.77295	0.22694	5	0	143	148	668	0.0264003	0.10579	0.0146417	7.22523	0.221557	0.0528006
TCGA-19-5960-01A	3	9	96	108	6547	128	6419	263179	439	579	209	1227	77601	500	547	205	1252	78405	230	601	1180	2011	53649	225	571	1133	1929	53524	2	6	150	158	856	0.0241332	0.0819077	0.0159928	5.12153	0.184579	3	6	136	145	838	0.0221475	0.0721034	0.01562	4.61608	0.173031	0.0436841
TCGA-26-5132-01A	1	5	32	38	7192	59	7133	292453	346	613	169	1128	84108	372	613	176	1161	84754	248	376	1830	2454	61773	241	377	1772	2390	61818	2	6	242	250	1337	0.0347608	0.104603	0.021628	4.83644	0.186986	0	3	259	262	1313	0.0364294	0.106764	0.0212552	5.02297	0.199543	0.0696607
TCGA-26-5135-01A	3	5	116	124	8267	149	8118	332838	456	575	201	1232	96477	485	566	218	1269	96830	234	563	2036	2833	69821	212	591	1981	2784	69710	2	2	262	266	1347	0.0321761	0.095546	0.0193229	4.9447	0.197476	4	9	299	312	1424	0.0377404	0.110131	0.020395	5.39988	0.219101	0.0678602
TCGA-27-1831-01A	4	4	21	29	5252	45	5207	213487	228	379	127	734	61919	228	369	88	685	61438	158	308	1510	1976	45034	146	256	1410	1812	45096	1	2	220	223	1047	0.04246	0.123068	0.0232171	5.30076	0.212989	1	1	243	245	1066	0.0466489	0.123988	0.023671	5.23796	0.229831	0.0881569
TCGA-27-2523-01A	2	22	51	75	7181	55	7126	292166	408	576	178	1162	84672	366	586	194	1146	85560	291	412	1673	2376	61098	270	464	1708	2442	60836	3	3	262	268	1256	0.0373207	0.109746	0.0206457	5.3157	0.213376	2	2	259	263	1260	0.0366244	0.11069	0.0206226	5.36742	0.20873	0.0725526
TCGA-27-2528-01A	5	9	50	64	6604	72	6532	267812	375	488	180	1043	78362	362	477	180	1019	78387	188	450	1625	2263	55537	204	442	1561	2207	55526	3	3	204	210	1085	0.0317989	0.0951518	0.0195404	4.86949	0.193548	2	3	240	245	1065	0.0370987	0.108263	0.0191764	5.64566	0.230047	0.067232
TCGA-32-1970-01A	2	26	82	110	7783	61	7722	316602	436	549	214	1199	91536	420	590	183	1193	92967	260	559	1893	2712	66437	250	554	1814	2618	65662	1	1	291	293	1389	0.0376462	0.111917	0.0211538	5.29066	0.210943	2	2	275	279	1342	0.0358474	0.102876	0.0201996	5.09298	0.207899	0.0727226
TCGA-41-5651-01A	3	7	63	73	10058	79	9979	409139	734	746	251	1731	119609	687	785	216	1688	119077	295	877	2155	3327	85286	336	873	2024	3233	85167	3	7	288	298	1589	0.0296282	0.0921745	0.0186575	4.94035	0.187539	1	5	291	297	1526	0.0295287	0.0892696	0.0178927	4.98915	0.194626	0.0575661
Totals	105	221	1306	1632	171353	1781	169572	6952452	9892	14307	4472	28671	2027268	9906	14196	4401	28503	2037740	5741	11992	39284	57017	1443855	5623	11862	37896	55381	1443585	40	91	5336	5467	27726	0.0319049	0.0987162	0.0192064	5.13977	0.19718	55	75	5543	5673	27578	0.0331071	0.0994966	0.0191003	5.20918	0.205707	0.0634888
[truncated: 12 more columns]

## Sheet: gCg_to_T_HNSC
Sample	A_T_coord_clusters	G_C_coord_clusters	Non_coord_clusters	clusters	mutations	complex	substitutions	bases	A_to_T	A_to_G	A_to_C	A	a	T_to_A	T_to_C	T_to_G	T	t	G_to_C	G_to_T	G_to_A	G	g	C_to_G	C_to_A	C_to_T	C	c	gCg_to_G	gCg_to_A	gCg_to_T	gCg	gcg	gCg_per_mut	gCg_per_C	gcg_per_c	enrich_gCg	freq_gCg	cGc_to_C	cGc_to_T	cGc_to_A	cGc	cgc	cGc_per_mut	cGc_per_G	cgc_per_g	enrich_cGc	freq_cGc	[gCg_to_T+revcomp]_per_mut
TCGA-BA-4076-01A	2	4	676	682	64295	1242	63053	2585173	4109	4433	1117	9659	769102	3907	4322	1140	9369	769575	4245	11905	6191	22341	523867	4134	11539	6011	21684	522610	105	241	158	504	5949	0.00783887	0.0232429	0.0113832	2.04185	0.0847201	101	227	144	472	5999	0.00734116	0.0211271	0.0114514	1.84494	0.0786798	0.0046971
TCGA-BA-4077-01B	0	53	47	100	18051	283	17768	728488	519	529	250	1298	215517	491	528	227	1246	215774	2826	1022	3583	7431	148127	2922	1078	3793	7793	149070	3	7	78	88	1622	0.00487508	0.0112922	0.0108808	1.03781	0.054254	2	6	86	94	1607	0.00520747	0.0126497	0.0108488	1.166	0.0584941	0.00908537
TCGA-BA-5153-01A	0	2	21	23	3204	43	3161	129601	155	270	93	518	38556	131	270	116	517	38609	173	317	565	1055	26276	202	289	580	1071	26154	0	4	58	62	371	0.0193508	0.0578898	0.0141852	4.081	0.167116	1	3	63	67	371	0.0209114	0.0635071	0.0141193	4.49788	0.180593	0.0377653
TCGA-BA-A4IH-01A	2	11	29	42	3867	50	3817	156497	136	227	82	445	45533	120	246	103	469	45322	331	254	870	1455	33080	351	240	857	1448	32562	2	1	53	56	490	0.0144815	0.038674	0.0150482	2.57001	0.114286	3	10	60	73	550	0.0188777	0.0501718	0.0166264	3.01761	0.132727	0.0292216
TCGA-CN-4737-01A	2	3	15	20	3367	68	3299	135259	144	273	135	552	39870	178	260	140	578	40893	161	253	683	1097	27382	157	287	628	1072	27114	6	5	63	74	475	0.021978	0.0690299	0.0175186	3.94037	0.155789	1	7	62	70	490	0.02079	0.0638104	0.017895	3.56583	0.142857	0.037125
TCGA-CN-4741-01A	2	6	46	54	11046	136	10910	447310	641	810	239	1690	132657	650	832	271	1753	133530	600	973	2243	3816	90932	579	949	2123	3651	90191	8	17	144	169	1264	0.0152997	0.0462887	0.0140147	3.30287	0.133703	8	28	161	197	1264	0.0178345	0.0516247	0.0139005	3.71388	0.155854	0.0276118
TCGA-CN-5365-01A	2	10	24	36	5409	89	5320	218120	251	434	176	861	66324	277	451	185	913	66605	352	558	853	1763	42126	352	575	856	1783	43065	3	5	34	42	452	0.00776484	0.0235558	0.0104958	2.24432	0.0929204	1	6	47	54	459	0.00998336	0.0306296	0.0108959	2.81112	0.117647	0.014975
TCGA-CN-5374-01A	3	31	21	55	10897	98	10799	442759	354	476	248	1078	131973	419	482	252	1153	130716	1365	495	2565	4425	90560	1301	505	2337	4143	89510	7	6	113	126	1100	0.0115628	0.0304127	0.0122891	2.47477	0.114545	5	7	113	125	1062	0.011471	0.0282486	0.011727	2.40884	0.117702	0.0207397
TCGA-CR-5249-01A	1	2	18	21	2362	66	2296	94136	105	193	64	362	28108	92	204	72	368	28092	73	195	523	791	18823	69	194	512	775	19113	2	1	70	73	400	0.030906	0.0941935	0.0209282	4.5008	0.1825	2	1	60	63	386	0.0266723	0.079646	0.0205068	3.88388	0.163212	0.0550381
TCGA-CR-5250-01A	0	9	16	25	3611	57	3554	145714	160	234	92	486	42681	160	246	100	506	43332	262	242	815	1319	29777	236	256	751	1243	29924	2	4	65	71	494	0.0196621	0.0571199	0.0165085	3.46003	0.143725	3	1	64	68	501	0.0188313	0.0515542	0.0168251	3.06413	0.135729	0.0357242
TCGA-CR-6467-01A	2	10	23	35	3547	86	3461	141901	142	239	106	487	41481	158	263	122	543	41561	172	273	812	1257	29508	154	252	768	1174	29351	3	4	79	86	501	0.0242458	0.0732538	0.0170693	4.29156	0.171657	5	4	71	80	544	0.0225543	0.0636436	0.0184357	3.4522	0.147059	0.0422893
TCGA-CR-6470-01A	0	4	9	13	2577	25	2552	104632	93	176	70	339	30810	90	169	74	333	30950	102	265	578	945	21322	126	255	554	935	21550	1	4	49	54	340	0.0209546	0.057754	0.0157773	3.66059	0.158824	1	4	64	69	360	0.0267753	0.0730159	0.016884	4.32457	0.191667	0.0438494
TCGA-CR-6472-01A	0	274	199	473	41363	365	40998	1680918	461	625	392	1478	485454	440	602	371	1413	487826	8849	1928	8542	19319	353782	8606	1815	8367	18788	353856	11	7	115	133	4208	0.00321543	0.00707899	0.0118918	0.595281	0.0316065	4	4	108	116	4182	0.00280444	0.00600445	0.0118208	0.507955	0.0277379	0.00539129
TCGA-CR-6480-01A	1	174	78	253	6776	125	6651	272691	140	270	106	516	78182	153	273	95	521	79107	748	338	1661	2747	57654	786	328	1753	2867	57748	3	1	58	62	805	0.00914994	0.0216254	0.0139399	1.55133	0.0770186	0	7	69	76	832	0.0112161	0.0276665	0.0144309	1.91717	0.0913462	0.0187426
TCGA-CR-6482-01A	0	14	11	25	2677	26	2651	108691	98	146	68	312	31835	109	155	62	326	31980	186	238	549	973	22150	174	268	598	1040	22726	2	4	44	50	354	0.0186776	0.0480769	0.0155769	3.08643	0.141243	0	6	34	40	366	0.0149421	0.04111	0.0165237	2.48794	0.10929	0.0291371
TCGA-CR-6487-01A	0	40	22	62	8210	63	8147	334027	188	915	119	1222	98623	173	852	146	1171	99245	552	438	1906	2896	68113	596	429	1833	2858	68046	2	4	100	106	845	0.0129111	0.0370889	0.0124181	2.98669	0.125444	1	2	100	103	900	0.0125457	0.0355663	0.0132133	2.6917	0.114444	0.0243605
TCGA-CR-7385-01A	0	2	9	11	2480	24	2456	100696	84	140	78	302	29255	77	135	75	287	29570	150	158	606	914	20927	167	156	630	953	20944	0	0	33	33	289	0.0133065	0.0346275	0.0137987	2.50947	0.114187	2	3	40	45	302	0.0181452	0.0492341	0.0144311	3.41166	0.149007	0.0294355
TCGA-CR-7404-01A	1	65	30	96	7011	83	6928	284048	108	162	65	335	83596	108	177	61	346	83788	985	349	1785	3119	58695	962	291	1875	3128	57969	2	2	57	61	695	0.00870061	0.0195013	0.0119892	1.62658	0.0877698	0	2	47	49	662	0.00698902	0.0157102	0.0112786	1.39291	0.0740181	0.0148338
TCGA-CV-5442-01A	1	79	47	127	23347	171	23176	950216	377	763	836	1976	279802	409	724	829	1962	280799	2231	1092	6461	9784	195595	2219	1040	6195	9454	194020	4	8	258	270	2565	0.0115647	0.0285593	0.0132203	2.16027	0.105263	5	15	279	299	2499	0.0128068	0.0305601	0.0127764	2.39192	0.119648	0.0230008
TCGA-CV-5443-01A	1	4	17	22	4437	46	4391	180031	222	317	88	627	52177	226	307	81	614	53092	166	483	924	1573	37628	143	484	950	1577	37134	4	8	99	111	637	0.0250169	0.0703868	0.0171541	4.10321	0.174254	4	9	90	103	604	0.0232139	0.06548	0.0160519	4.07927	0.17053	0.0425963
TCGA-CV-6433-01A	2	1	19	22	5128	211	4917	201597	323	335	144	802	59494	344	329	151	824	59238	222	436	997	1655	41488	185	483	968	1636	41377	1	7	94	102	675	0.0198908	0.0623472	0.0163134	3.82184	0.151111	3	6	80	89	633	0.0173557	0.0537764	0.0152574	3.52461	0.1406	0.0339314
TCGA-CV-6961-01A	0	440	255	695	38249	420	37829	1550989	524	709	222	1455	451051	493	693	223	1409	454327	6549	1442	8922	16913	321776	7254	1464	9334	18052	323835	6	6	108	120	3543	0.00313734	0.00664746	0.0109408	0.607587	0.0338696	9	18	123	150	3684	0.00392167	0.00886892	0.011449	0.774648	0.0407166	0.00603937
TCGA-CV-7090-01A	3	20	15	38	3354	72	3282	134562	119	195	103	417	40138	129	246	116	491	41006	313	274	632	1219	26605	307	264	584	1155	26813	2	1	40	43	379	0.0128205	0.0372294	0.0141349	2.63386	0.113456	0	2	58	60	381	0.0178891	0.0492207	0.0143206	3.43705	0.15748	0.0292188
TCGA-CV-7100-01A	2	3	19	24	2832	42	2790	114390	113	203	71	387	34050	104	202	61	367	33954	137	311	608	1056	23296	107	290	583	980	23090	2	4	38	44	359	0.0155367	0.044898	0.0155479	2.88773	0.122563	0	4	68	72	350	0.0254237	0.0681818	0.015024	4.53818	0.205714	0.0374294
TCGA-CV-7180-01A	5	4	26	35	4892	71	4821	197661	347	411	154	912	59132	338	418	125	881	60565	170	526	781	1477	38806	183	553	815	1551	39158	3	6	63	72	528	0.0147179	0.0464217	0.0134838	3.44276	0.136364	3	10	56	69	550	0.0141047	0.0467163	0.0141731	3.29613	0.125455	0.0243254
TCGA-CV-7255-01A	2	12	26	40	7396	245	7151	293191	388	428	224	1040	87210	398	498	250	1146	87386	448	660	1339	2447	59004	495	676	1347	2518	59591	2	3	100	105	828	0.0141969	0.0416998	0.0138947	3.00112	0.126812	4	6	101	111	831	0.0150081	0.0453617	0.0140838	3.22084	0.133574	0.0271769
TCGA-CV-7416-01A	4	14	199	217	8266	415	7851	321891	363	644	311	1318	95775	406	611	316	1333	95054	469	661	1496	2626	65638	451	692	1431	2574	65424	2	9	142	153	964	0.0185096	0.0594406	0.0147347	4.03407	0.158714	5	8	137	150	980	0.0181466	0.0571211	0.0149304	3.82583	0.153061	0.0337527
Totals	38	1291	1917	3246	298651	4622	294029	12055189	10664	14557	5653	30874	3548386	10580	14495	5764	30839	3561896	32837	26086	57490	116413	2472937	33218	25652	57033	115903	2471945	188	369	2313	2870	31132	0.00960988	0.0247621	0.0125941	1.96616	0.0921881	173	406	2385	2964	31349	0.00992463	0.0254611	0.0126768	2.00847	0.0945485	0.0157307
[truncated: 12 more columns]

## Sheet: gCg_to_T_KICH
Sample	A_T_coord_clusters	G_C_coord_clusters	Non_coord_clusters	clusters	mutations	complex	substitutions	bases	A_to_T	A_to_G	A_to_C	A	a	T_to_A	T_to_C	T_to_G	T	t	G_to_C	G_to_T	G_to_A	G	g	C_to_G	C_to_A	C_to_T	C	c	gCg_to_G	gCg_to_A	gCg_to_T	gCg	gcg	gCg_per_mut	gCg_per_C	gcg_per_c	enrich_gCg	freq_gCg	cGc_to_C	cGc_to_T	cGc_to_A	cGc	cgc	cGc_per_mut	cGc_per_G	cgc_per_g	enrich_cGc	freq_cGc	[gCg_to_T+revcomp]_per_mut
TCGA-KL-8323-01A	2	3	28	33	2611	96	2515	103115	132	211	67	410	30304	133	222	101	456	30815	146	183	538	867	21023	142	183	457	782	20973	1	4	48	53	393	0.0202987	0.0677749	0.0187384	3.61691	0.13486	3	0	61	64	378	0.0245117	0.0738178	0.0179803	4.10548	0.169312	0.0417465
TCGA-KL-8325-01A	4	5	31	40	1700	80	1620	66420	86	136	59	281	19864	106	175	68	349	20458	66	130	322	518	13069	66	111	295	472	13029	0	2	33	35	235	0.0205882	0.0741525	0.0180367	4.11121	0.148936	1	1	32	34	257	0.02	0.0656371	0.0196649	3.33779	0.132296	0.0382353
TCGA-KL-8341-01A	2	27	55	84	2922	125	2797	114677	129	217	79	425	33969	162	190	87	439	34096	192	185	634	1011	23295	178	195	549	922	23317	0	1	67	68	451	0.0232717	0.0737527	0.0193421	3.81306	0.150776	0	4	60	64	432	0.0219028	0.0633037	0.0185448	3.41356	0.148148	0.0434634
TCGA-KL-8342-01A	4	1	31	36	1317	67	1250	51250	76	121	63	260	15286	90	143	54	287	15670	46	68	260	374	10094	53	65	211	329	10200	1	0	24	25	188	0.0189825	0.0759878	0.0184314	4.12274	0.132979	1	0	33	34	175	0.0258162	0.0909091	0.017337	5.24364	0.194286	0.0432802
TCGA-KM-8440-01A	1	6	54	61	1722	189	1533	62853	105	126	48	279	19027	111	175	66	352	19244	52	115	268	435	12133	65	143	259	467	12449	2	1	23	26	231	0.0150987	0.0556745	0.0185557	3.0004	0.112554	0	1	27	28	260	0.0162602	0.0643678	0.0214292	3.00375	0.107692	0.029036
TCGA-KN-8418-01A	2	3	22	27	1822	89	1733	71053	104	137	60	301	21513	91	154	77	322	21626	70	170	301	541	14037	73	193	303	569	13877	2	2	25	29	211	0.0159166	0.0509666	0.015205	3.35196	0.137441	2	1	18	21	196	0.0115258	0.038817	0.0139631	2.77997	0.107143	0.0236004
TCGA-KN-8424-01A	1	4	15	20	2010	68	1942	79622	108	140	63	311	23485	126	168	68	362	24163	95	170	367	632	15881	96	150	391	637	16093	1	2	48	51	276	0.0253731	0.0800628	0.0171503	4.6683	0.184783	1	1	38	40	254	0.0199005	0.0632911	0.015994	3.95719	0.15748	0.0427861
TCGA-KN-8429-01A	1	3	29	33	1071	91	980	40180	71	113	40	224	12080	63	90	39	192	11886	34	88	162	284	7941	43	69	168	280	8273	0	3	13	16	129	0.0149393	0.0571429	0.0155929	3.66467	0.124031	0	1	20	21	168	0.0196078	0.0739437	0.021156	3.49516	0.125	0.0308123
TCGA-KN-8434-01A	1	1	22	24	1849	94	1755	71955	105	131	48	284	20876	84	171	75	330	21776	70	136	352	558	14724	61	138	384	583	14579	0	1	45	46	308	0.0248783	0.0789022	0.0211263	3.73479	0.149351	0	4	30	34	280	0.0183883	0.0609319	0.0190166	3.20415	0.121429	0.0405625
TCGA-KN-8435-01A	3	4	57	64	2607	205	2402	98482	149	188	82	419	28881	174	210	82	466	29755	102	193	508	803	19887	106	184	424	714	19959	0	2	37	39	357	0.0149597	0.0546218	0.0178867	3.05377	0.109244	3	3	49	55	377	0.021097	0.0684932	0.0189571	3.61306	0.145889	0.0329881
TCGA-KO-8406-01A	4	4	40	48	1120	159	961	39401	66	104	42	212	12011	78	124	52	254	12743	28	56	164	248	7168	41	57	149	247	7479	3	1	10	14	122	0.0125	0.0566802	0.0163123	3.47468	0.114754	0	2	10	12	151	0.0107143	0.0483871	0.0210658	2.29695	0.0794702	0.0178571
TCGA-KO-8407-01A	0	2	38	40	1374	93	1281	52521	73	115	50	238	16348	100	151	67	318	15927	71	92	220	383	10208	69	83	190	342	10038	1	3	22	26	167	0.0189229	0.0760234	0.0166368	4.5696	0.155689	1	0	17	18	169	0.0131004	0.0469974	0.0165556	2.83875	0.106509	0.0283843
TCGA-KO-8411-01A	1	7	56	64	1685	185	1500	61500	80	170	43	293	18495	92	198	72	362	18939	56	79	283	418	12021	53	98	276	427	12045	0	2	31	33	235	0.0195846	0.0772834	0.0195102	3.96118	0.140426	2	1	25	28	245	0.0166172	0.0669856	0.020381	3.28667	0.114286	0.0332344
TCGA-KO-8416-01A	4	1	50	55	1583	136	1447	59327	94	127	62	283	17859	81	194	82	357	18392	48	106	253	407	11541	51	82	267	400	11517	1	1	20	22	224	0.0138977	0.055	0.0194495	2.82783	0.0982143	1	1	30	32	208	0.0202148	0.0786241	0.0180227	4.3625	0.153846	0.0315856
TCGA-KO-8417-01A	0	1	31	32	1221	88	1133	46453	79	91	38	208	14089	69	136	48	253	14909	49	83	258	390	8921	52	62	168	282	8527	2	1	25	28	207	0.022932	0.0992908	0.0242758	4.09011	0.135266	1	0	24	25	191	0.020475	0.0641026	0.0214102	2.99403	0.13089	0.040131
Totals	30	72	559	661	26614	1765	24849	1018809	1457	2127	844	4428	304087	1560	2501	1038	5099	310399	1125	1854	4890	7869	201943	1149	1813	4491	7453	202355	14	26	471	511	3734	0.0192004	0.068563	0.0184527	3.7156	0.136851	16	20	474	510	3741	0.0191628	0.0648113	0.018525	3.49858	0.136327	0.0355076
[truncated: 12 more columns]

## Sheet: gCg_to_T_KIRC
Sample	A_T_coord_clusters	G_C_coord_clusters	Non_coord_clusters	clusters	mutations	complex	substitutions	bases	A_to_T	A_to_G	A_to_C	A	a	T_to_A	T_to_C	T_to_G	T	t	G_to_C	G_to_T	G_to_A	G	g	C_to_G	C_to_A	C_to_T	C	c	gCg_to_G	gCg_to_A	gCg_to_T	gCg	gcg	gCg_per_mut	gCg_per_C	gcg_per_c	enrich_gCg	freq_gCg	cGc_to_C	cGc_to_T	cGc_to_A	cGc	cgc	cGc_per_mut	cGc_per_G	cgc_per_g	enrich_cGc	freq_cGc	[gCg_to_T+revcomp]_per_mut
TCGA-A3-3308-01A	3	5	15	23	6145	142	6003	246123	392	476	379	1247	73523	407	547	368	1322	75570	291	569	852	1712	48485	316	593	813	1722	48545	3	7	44	54	574	0.00878763	0.0313589	0.0118241	2.65212	0.0940767	3	5	37	45	557	0.00732303	0.026285	0.0114881	2.28803	0.0807899	0.0131814
TCGA-A3-3324-01A	1	1	12	14	2710	48	2662	109142	175	261	129	565	31374	160	295	117	572	31669	157	214	413	784	23135	125	204	412	741	22964	1	0	31	32	342	0.0118081	0.0431849	0.0148929	2.8997	0.0935673	1	0	30	31	333	0.0114391	0.0395408	0.0143938	2.74708	0.0930931	0.0225092
TCGA-A3-3370-01A	2	2	26	30	3220	167	3053	125173	232	336	152	720	37663	218	407	182	807	38352	146	212	434	792	24836	139	200	395	734	24322	4	1	20	25	280	0.00776398	0.0340599	0.0115122	2.95859	0.0892857	0	3	19	22	288	0.0068323	0.0277778	0.0115961	2.39545	0.0763889	0.0121118
TCGA-A3-3372-01A	3	4	29	36	5675	165	5510	225910	354	515	347	1216	68171	380	532	339	1251	68305	359	440	712	1511	44643	353	459	720	1532	44791	1	5	49	55	536	0.00969163	0.0359008	0.0119667	3.00006	0.102612	3	4	52	59	539	0.0103965	0.039047	0.0120736	3.23409	0.109462	0.0177974
TCGA-A3-3387-01A	3	1	15	19	3339	123	3216	131856	228	266	201	695	38885	254	306	201	761	40133	168	332	362	862	26529	178	328	392	898	26309	1	5	14	20	285	0.00598982	0.0222717	0.0108328	2.05595	0.0701754	3	4	13	20	305	0.00598982	0.0232019	0.0114969	2.01811	0.0655738	0.00808625
TCGA-AK-3454-01A	2	4	20	26	3621	128	3493	143213	248	412	132	792	42066	257	431	185	873	43319	188	224	506	918	29043	180	216	514	910	28785	3	4	23	30	382	0.008285	0.032967	0.0132708	2.48418	0.078534	2	1	32	35	413	0.00966584	0.0381264	0.0142203	2.68112	0.0847458	0.0151892
TCGA-AK-3455-01A	2	5	21	28	4368	119	4249	174209	276	382	202	860	52034	297	363	221	881	53148	192	450	685	1327	35026	172	375	634	1181	34001	3	2	36	41	457	0.00938645	0.0347163	0.0134408	2.58291	0.0897155	2	10	41	53	436	0.0121337	0.0399397	0.0124479	3.20855	0.12156	0.0176282
TCGA-B0-5094-01A	1	4	24	29	6038	144	5894	241654	361	590	313	1264	72057	357	604	363	1324	72359	384	469	781	1634	48556	388	493	791	1672	48682	6	2	34	42	563	0.00695595	0.0251196	0.0115648	2.17207	0.0746004	3	4	34	41	576	0.00679033	0.0250918	0.0118626	2.1152	0.0711806	0.011262
TCGA-B0-5693-01A	4	2	14	20	3241	125	3116	127756	205	304	169	678	38587	215	311	235	761	39005	172	264	391	827	25279	191	266	393	850	24885	2	4	22	28	302	0.00863931	0.0329412	0.0121358	2.71437	0.0927152	2	3	12	17	319	0.00524529	0.0205562	0.0126192	1.62897	0.0532915	0.0104906
TCGA-B2-4099-01A	6	6	29	41	4874	134	4740	194340	320	418	222	960	57979	297	467	214	978	59010	255	493	687	1435	38440	241	467	659	1367	38911	4	4	23	31	449	0.00636028	0.0226774	0.0115392	1.96526	0.0690423	1	4	32	37	462	0.0075913	0.025784	0.0120187	2.14532	0.0800866	0.0112844
TCGA-B2-4101-01A	3	1	12	16	4085	137	3948	161868	295	305	174	774	48712	264	387	200	851	49560	207	421	506	1134	31647	218	462	509	1189	31949	1	3	17	21	372	0.00514076	0.0176619	0.0116436	1.51688	0.0564516	2	7	19	28	353	0.00685435	0.0246914	0.0111543	2.21362	0.0793201	0.00881273
TCGA-B2-4102-01A	1	1	12	14	3926	130	3796	155636	266	303	197	766	46196	267	355	193	815	47421	225	378	519	1122	30848	185	360	548	1093	31171	3	4	19	26	374	0.00662252	0.0237877	0.0119983	1.98259	0.0695187	2	4	15	21	390	0.00534896	0.0187166	0.0126426	1.48043	0.0538462	0.00866021
TCGA-BP-4781-01A	2	1	25	28	5686	175	5511	225951	384	460	256	1100	67754	377	488	288	1153	68192	302	546	779	1627	44811	304	561	766	1631	45194	0	6	43	49	547	0.00861766	0.0300429	0.0121034	2.48219	0.0895795	4	4	51	59	574	0.0103764	0.0362631	0.0128094	2.83098	0.102787	0.0165318
TCGA-BP-4968-01A	2	1	16	19	3787	126	3661	150101	216	266	143	625	44156	264	373	176	813	46195	175	374	547	1096	29784	173	395	559	1127	29966	2	3	38	43	415	0.0113546	0.0381544	0.013849	2.75502	0.103614	1	2	36	39	417	0.0102984	0.0355839	0.0140008	2.54156	0.0935252	0.0195405
TCGA-BP-4977-01A	1	4	16	21	3367	65	3302	135382	165	293	94	552	38035	175	286	113	574	38052	178	375	570	1123	29601	129	340	584	1053	29694	1	5	45	51	513	0.015147	0.048433	0.0172762	2.80345	0.0994152	4	6	51	61	474	0.018117	0.0543188	0.016013	3.39217	0.128692	0.028512
TCGA-BP-5010-01A	4	1	15	20	3687	63	3624	148584	237	264	187	688	42325	230	309	183	722	42651	222	376	524	1122	31950	216	361	515	1092	31658	2	5	37	44	412	0.0119338	0.040293	0.0130141	3.09611	0.106796	2	3	37	42	432	0.0113914	0.0374332	0.0135211	2.76849	0.0972222	0.0200705
TCGA-BP-5168-01A	3	2	18	23	8232	228	8004	328164	636	715	596	1947	97285	604	785	606	1995	99626	560	620	928	2108	65949	500	616	838	1954	65304	2	3	24	29	722	0.00352284	0.0148414	0.011056	1.34238	0.0401662	4	8	28	40	713	0.00485909	0.0189753	0.0108114	1.75513	0.056101	0.00631681
TCGA-CJ-4639-01A	4	2	13	19	3675	129	3546	145386	276	289	202	767	43885	291	358	225	874	44495	186	306	491	983	28490	200	283	439	922	28516	2	0	22	24	325	0.00653061	0.0260304	0.0113971	2.28394	0.0738462	4	2	20	26	332	0.00707483	0.0264496	0.0116532	2.26973	0.0783133	0.0114286
TCGA-CJ-4885-01A	3	6	24	33	4733	147	4586	188026	345	414	247	1006	56103	343	440	293	1076	56411	233	371	616	1220	37832	287	382	615	1284	37680	5	5	26	36	434	0.00760617	0.0280374	0.011518	2.43421	0.0829493	2	6	33	41	496	0.00866258	0.0336066	0.0131106	2.56331	0.0826613	0.0124657
TCGA-CJ-4899-01A	2	0	10	12	2593	128	2465	101065	215	242	147	604	30373	218	291	192	701	31450	139	186	294	619	19784	116	174	251	541	19458	0	1	13	14	280	0.00539915	0.025878	0.01439	1.79834	0.05	0	4	10	14	278	0.00539915	0.0226171	0.0140518	1.60956	0.0503597	0.00887003
TCGA-CJ-4918-01A	1	0	22	23	3875	160	3715	152315	304	273	152	729	45421	324	320	199	843	47408	144	431	489	1064	29794	131	446	502	1079	29692	1	4	17	22	358	0.00567742	0.0203892	0.0120571	1.69105	0.0614525	2	4	20	26	350	0.00670968	0.0244361	0.0117473	2.08014	0.0742857	0.00954839
TCGA-CJ-5682-01A	4	2	25	31	6308	184	6124	251084	413	499	353	1265	74918	446	551	356	1353	77051	325	536	846	1707	49366	341	626	832	1799	49749	2	13	56	71	631	0.0112555	0.0394664	0.0126837	3.11159	0.11252	3	3	50	56	591	0.00887762	0.0328061	0.0119718	2.74028	0.0947547	0.0168041
TCGA-CJ-6033-01A	3	3	11	17	4133	129	4004	164164	247	334	224	805	49800	282	404	221	907	50170	200	414	561	1175	31937	196	401	520	1117	32257	3	4	24	31	383	0.0075006	0.0277529	0.0118734	2.3374	0.0809399	1	3	20	24	407	0.00580692	0.0204255	0.0127438	1.60278	0.0589681	0.010646
TCGA-CW-6087-01A	1	0	7	8	1608	69	1539	63099	115	184	77	376	18967	118	206	84	408	19533	73	107	197	377	12005	81	120	177	378	12580	0	0	6	6	163	0.00373134	0.015873	0.0129571	1.22505	0.0368098	1	1	7	9	163	0.00559701	0.0238727	0.0135777	1.75823	0.0552147	0.00808458
TCGA-CW-6093-01A	2	1	14	17	7239	202	7037	288517	470	574	429	1473	84622	472	607	452	1531	86650	412	685	960	2057	58955	426	688	862	1976	58290	2	6	25	33	700	0.00455864	0.0167004	0.0120089	1.39067	0.0471429	4	16	34	54	697	0.00745959	0.0262518	0.0118226	2.22048	0.0774749	0.0081503
TCGA-CZ-4856-01A	1	4	14	19	4211	154	4057	166337	294	329	171	794	49852	304	382	216	902	51382	234	399	571	1204	32778	252	399	506	1157	32325	1	6	28	35	403	0.00831156	0.0302506	0.0124671	2.42643	0.0868486	4	4	34	42	379	0.00997388	0.0348837	0.0115626	3.01694	0.110818	0.0147233
TCGA-CZ-5454-01A	0	0	19	19	3853	97	3756	153996	228	324	177	729	46514	259	337	230	826	46794	224	341	542	1107	30485	209	328	557	1094	30203	4	4	22	30	364	0.00778614	0.0274223	0.0120518	2.27537	0.0824176	3	5	20	28	336	0.00726706	0.0252936	0.0110218	2.29487	0.0833333	0.0109006
TCGA-CZ-5987-01A	2	5	18	25	4239	124	4115	168715	270	322	236	828	50466	279	432	218	929	51489	209	366	659	1234	33898	193	375	556	1124	32862	5	3	36	44	463	0.0103798	0.0391459	0.0140892	2.77843	0.0950324	3	7	37	47	444	0.0110875	0.0380875	0.0130981	2.90786	0.105856	0.017221
TCGA-DV-5566-01A	1	1	18	20	4293	136	4157	170437	274	263	146	683	50982	322	334	180	836	51358	226	472	658	1356	34218	215	462	605	1282	33879	4	7	28	39	437	0.00908456	0.0304212	0.0128988	2.35844	0.0892449	6	6	27	39	430	0.00908456	0.0287611	0.0125665	2.28871	0.0906977	0.0128116
Totals	67	69	514	650	126761	3878	122883	5038203	8441	10613	6454	25508	1498705	8681	11908	7050	27639	1526758	6786	11371	17080	35237	1008104	6655	11380	16464	34499	1004622	68	116	822	1006	12466	0.00793619	0.0291603	0.0124086	2.35	0.0806995	72	133	851	1056	12484	0.00833064	0.0299685	0.0123836	2.42001	0.0845883	0.0131981
[truncated: 12 more columns]

## Sheet: gCg_to_T_LGG
Sample	A_T_coord_clusters	G_C_coord_clusters	Non_coord_clusters	clusters	mutations	complex	substitutions	bases	A_to_T	A_to_G	A_to_C	A	a	T_to_A	T_to_C	T_to_G	T	t	G_to_C	G_to_T	G_to_A	G	g	C_to_G	C_to_A	C_to_T	C	c	gCg_to_G	gCg_to_A	gCg_to_T	gCg	gcg	gCg_per_mut	gCg_per_C	gcg_per_c	enrich_gCg	freq_gCg	cGc_to_C	cGc_to_T	cGc_to_A	cGc	cgc	cGc_per_mut	cGc_per_G	cgc_per_g	enrich_cGc	freq_cGc	[gCg_to_T+revcomp]_per_mut
TCGA-CS-5395-01A	5	1	50	56	5465	45	5420	222220	308	393	142	843	65156	329	458	138	925	64537	182	365	1313	1860	46330	164	371	1257	1792	46197	1	5	204	210	972	0.0384263	0.117188	0.0210403	5.56966	0.216049	1	3	203	207	957	0.0378774	0.11129	0.0206562	5.38775	0.216301	0.0744739
TCGA-CS-6668-01A	1	1	12	14	2700	23	2677	109757	95	334	65	494	31443	100	338	78	516	32299	59	144	656	859	23319	68	111	629	808	22696	1	3	68	72	444	0.0266667	0.0891089	0.0195629	4.55499	0.162162	0	0	61	61	374	0.0225926	0.0710128	0.0160384	4.42767	0.163102	0.0477778
TCGA-CS-6669-01A	0	2	12	14	206	21	185	7585	12	30	14	56	2162	14	25	14	53	2160	6	8	21	35	1543	8	7	26	41	1702	2	0	4	6	39	0.0291262	0.146341	0.0229142	6.38649	0.153846	0	0	7	7	40	0.0339806	0.2	0.0259235	7.715	0.175	0.0533981
TCGA-DB-5278-01A	0	2	8	10	559	15	544	22304	28	65	16	109	6593	32	80	15	127	6888	13	26	102	141	4532	9	36	122	167	4291	1	1	14	16	92	0.0286225	0.0958084	0.0214402	4.46863	0.173913	0	0	7	7	67	0.0125224	0.0496454	0.0147838	3.3581	0.104478	0.0375671
TCGA-DU-5874-01A	1	4	26	31	3912	36	3876	158916	164	405	87	656	46064	151	441	108	700	46757	101	213	973	1287	33053	108	154	971	1233	33042	3	1	100	104	614	0.0265849	0.0843471	0.0185824	4.53908	0.169381	1	1	94	96	615	0.0245399	0.0745921	0.0186065	4.00893	0.156098	0.049591
TCGA-DU-6401-01A	1	0	13	14	1768	19	1749	71709	66	247	57	370	20961	69	243	60	372	20932	89	92	344	525	14926	80	93	309	482	14890	0	0	34	34	207	0.0192308	0.0705394	0.0139019	5.07407	0.164251	1	1	35	37	206	0.0209276	0.0704762	0.0138014	5.10644	0.179612	0.0390271
TCGA-DU-7009-01A	1	2	16	19	1591	24	1567	64247	61	183	27	271	18445	77	181	68	326	18990	62	91	314	467	13430	59	101	343	503	13382	0	2	41	43	269	0.027027	0.0854871	0.0201016	4.25274	0.159851	1	0	40	41	258	0.02577	0.0877944	0.0192107	4.57007	0.158915	0.0509114
TCGA-DU-7301-01A	4	1	30	35	2859	52	2807	115087	130	443	169	742	32692	106	443	141	690	32523	121	136	424	681	24972	130	134	430	694	24900	22	3	72	97	554	0.0339279	0.139769	0.022249	6.28206	0.17509	12	1	48	61	511	0.0213361	0.0895742	0.0204629	4.37739	0.119374	0.0419727
TCGA-E1-5318-01A	1	2	14	17	2487	26	2461	100901	91	279	71	441	29175	88	282	66	436	29276	80	141	586	807	21302	70	121	586	777	21148	1	2	59	62	366	0.0249296	0.0797941	0.0173066	4.61062	0.169399	3	1	59	63	406	0.0253317	0.0780669	0.0190592	4.09601	0.155172	0.0474467
TCGA-E1-5319-01A	6	0	11	17	1616	25	1591	65231	61	175	45	281	18617	59	225	54	338	18798	34	75	366	475	13831	55	65	377	497	13985	1	0	44	45	267	0.0278465	0.0905433	0.0190919	4.7425	0.168539	1	1	55	57	284	0.0352723	0.12	0.0205336	5.84408	0.200704	0.0612624
TCGA-EZ-7264-01A	2	4	20	26	2339	44	2295	94095	92	266	70	428	27505	85	281	72	438	27848	59	149	517	725	19511	71	131	502	704	19213	2	0	50	52	344	0.0222317	0.0738636	0.0179045	4.12541	0.151163	1	1	53	55	336	0.0235143	0.0758621	0.0172211	4.40519	0.16369	0.0440359
TCGA-FG-5964-01A	8	1	17	26	2655	52	2603	106723	102	345	144	591	29849	107	362	158	627	29964	70	96	534	700	23521	77	105	503	685	23389	16	1	45	62	485	0.0233522	0.0905109	0.0207362	4.36487	0.127835	14	0	41	55	470	0.0207156	0.0785714	0.0199821	3.93208	0.117021	0.0323917
TCGA-FG-8182-01A	1	1	9	11	1104	18	1086	44526	50	143	33	226	13124	52	145	35	232	13551	39	68	201	308	8872	51	50	219	320	8979	0	1	21	22	140	0.0199275	0.06875	0.0155919	4.40933	0.157143	0	0	22	22	146	0.0199275	0.0714286	0.0164563	4.34051	0.150685	0.0389493
TCGA-HT-7602-01A	2	1	11	14	640	18	622	25502	29	82	56	167	6900	21	83	44	148	7035	25	30	87	142	5744	33	35	97	165	5823	11	1	12	24	144	0.0375	0.145455	0.0247295	5.88182	0.166667	9	0	7	16	141	0.025	0.112676	0.0245474	4.59015	0.113475	0.0296875
TCGA-HT-7689-01A	2	3	25	30	2250	28	2222	91102	106	311	78	495	26659	95	345	93	533	26837	107	121	368	596	18743	111	126	361	598	18863	1	0	60	61	297	0.0271111	0.102007	0.0157451	6.47863	0.205387	0	1	51	52	275	0.0231111	0.0872483	0.0146721	5.94653	0.189091	0.0493333
TCGA-HT-7695-01A	1	0	12	13	1184	19	1165	47765	47	152	42	241	13913	46	146	32	224	14067	33	63	276	372	9955	29	41	258	328	9830	2	0	30	32	189	0.027027	0.097561	0.0192269	5.0742	0.169312	0	0	28	28	170	0.0236486	0.0752688	0.0170768	4.40765	0.164706	0.0489865
TCGA-HW-7486-01A	2	1	14	17	999	20	979	40139	38	129	32	199	12237	56	112	21	189	11619	41	50	220	311	8144	20	59	201	280	8139	1	0	19	20	140	0.02002	0.0714286	0.0172011	4.15255	0.142857	0	0	23	23	144	0.023023	0.073955	0.0176817	4.18257	0.159722	0.042042
TCGA-HW-7487-01A	2	0	19	21	2013	25	1988	81508	79	246	60	385	23428	92	248	68	408	24680	51	104	451	606	16417	60	99	430	589	16983	0	2	61	63	319	0.0312966	0.106961	0.0187835	5.69441	0.197492	2	0	65	67	329	0.0332837	0.110561	0.0200402	5.51696	0.203647	0.0625931
Totals	40	26	319	385	36347	510	35837	1469317	1559	4228	1208	6995	424923	1579	4438	1265	7282	428761	1172	1972	7753	10897	308145	1203	1839	7621	10663	307452	65	22	938	1025	5882	0.0282004	0.0961268	0.0191314	5.02455	0.17426	46	10	899	955	5729	0.0262745	0.0876388	0.0185919	4.71382	0.166696	0.0505406
[truncated: 12 more columns]

## Sheet: gCg_to_T_LUAD
Sample	A_T_coord_clusters	G_C_coord_clusters	Non_coord_clusters	clusters	mutations	complex	substitutions	bases	A_to_T	A_to_G	A_to_C	A	a	T_to_A	T_to_C	T_to_G	T	t	G_to_C	G_to_T	G_to_A	G	g	C_to_G	C_to_A	C_to_T	C	c	gCg_to_G	gCg_to_A	gCg_to_T	gCg	gcg	gCg_per_mut	gCg_per_C	gcg_per_c	enrich_gCg	freq_gCg	cGc_to_C	cGc_to_T	cGc_to_A	cGc	cgc	cGc_per_mut	cGc_per_G	cgc_per_g	enrich_cGc	freq_cGc	[gCg_to_T+revcomp]_per_mut
TCGA-05-4389-01A	2	8	47	57	17453	411	17042	698722	1084	1131	314	2529	200016	1209	1180	300	2689	200578	936	3029	1960	5925	149022	895	3178	1826	5899	149106	13	71	75	159	1946	0.00911018	0.0269537	0.0130511	2.06524	0.0817061	10	64	77	151	1898	0.00865181	0.0254852	0.0127364	2.00098	0.0795574	0.0087091
TCGA-05-4395-01A	0	24	120	144	37640	912	36728	1505848	2003	1481	504	3988	441842	2075	1530	507	4112	443834	2713	7388	4472	14573	310891	2501	7351	4203	14055	309281	35	90	83	208	3389	0.00552604	0.014799	0.0109577	1.35056	0.061375	26	122	101	249	3439	0.0066153	0.0170864	0.0110618	1.54464	0.0724048	0.00488842
TCGA-05-4396-01A	0	5	174	179	39703	953	38750	1588750	2524	1729	616	4869	464613	2430	1717	628	4775	463996	1886	8946	3568	14400	330494	2037	9223	3446	14706	329647	39	170	99	308	3895	0.0077576	0.0209438	0.0118157	1.77255	0.0790757	47	186	106	339	3951	0.0085384	0.0235417	0.0119548	1.96922	0.0858011	0.00516334
TCGA-05-4397-01A	0	7	650	657	97428	2844	94584	3877944	5584	5681	1448	12713	1103960	5447	5556	1450	12453	1103821	6155	19860	8881	34896	835715	6105	19648	8769	34522	834448	132	424	152	708	10589	0.0072669	0.0205087	0.0126898	1.61615	0.0668618	113	440	184	737	10482	0.00756456	0.0211199	0.0125426	1.68386	0.070311	0.0034487
TCGA-05-4398-01A	0	8	380	388	71369	1679	69690	2857290	4543	3454	1134	9131	818756	4555	3504	1215	9274	820231	3707	16823	5352	25882	610461	3560	16562	5281	25403	607842	91	280	118	489	7245	0.00685171	0.0192497	0.0119192	1.61501	0.0674948	68	264	103	435	7076	0.00609508	0.016807	0.0115912	1.44998	0.0614754	0.00309658
TCGA-05-4420-01A	0	5	59	64	29956	729	29227	1198307	1830	1098	455	3383	333060	1949	1126	436	3511	331586	1412	7536	2281	11229	267214	1409	7525	2170	11104	266447	38	173	52	263	3768	0.00877954	0.0236852	0.0141416	1.67485	0.0697983	27	171	54	252	3656	0.00841234	0.0224419	0.0136819	1.64026	0.0689278	0.00353852
TCGA-05-4422-01A	0	37	43	80	3954	66	3888	159408	189	297	85	571	45324	157	273	104	534	44881	358	302	764	1424	34415	382	286	691	1359	34788	5	6	39	50	541	0.0126454	0.0367918	0.0155513	2.36583	0.0924214	2	5	35	42	552	0.0106222	0.0294944	0.0160395	1.83886	0.076087	0.0187152
TCGA-05-4432-01A	0	6	165	171	47031	1193	45838	1879358	2658	2217	570	5445	528406	2794	2400	541	5735	529254	2556	10951	3873	17380	411482	2474	10910	3894	17278	410216	40	182	75	297	4902	0.00631498	0.0171895	0.0119498	1.43847	0.0605875	69	208	86	363	5071	0.00771831	0.0208861	0.0123237	1.69478	0.0715835	0.00342327
TCGA-05-5429-01A	3	3	25	31	3063	76	2987	122467	159	301	102	562	35447	172	322	116	610	35695	115	222	624	961	25855	111	194	549	854	25470	3	1	73	77	466	0.0251388	0.0901639	0.018296	4.92806	0.165236	3	5	78	86	514	0.028077	0.0894901	0.0198801	4.50149	0.167315	0.0492981
TCGA-38-4630-01A	5	32	74	111	13935	206	13729	562889	684	717	434	1835	167915	690	698	435	1823	168327	1274	1175	2630	5079	113363	1256	1170	2566	4992	113284	8	8	99	115	1348	0.0082526	0.0230369	0.0118993	1.93598	0.0853116	5	9	109	123	1391	0.0088267	0.0242174	0.0122703	1.97365	0.0884256	0.0149264
TCGA-44-2659-01A	0	4	166	170	41844	1209	40635	1666035	2237	1315	375	3927	466575	2151	1288	316	3755	466473	2197	11793	2803	16793	366843	2081	11232	2847	16160	366144	44	217	98	359	4716	0.00857949	0.0222153	0.0128802	1.72477	0.0761238	55	199	90	344	4626	0.00822101	0.0204847	0.0126103	1.62444	0.0743623	0.00449288
TCGA-44-2665-01A	2	5	13	20	2488	39	2449	100409	115	236	82	433	30118	118	212	84	414	29646	159	174	473	806	20588	174	161	461	796	20057	1	2	31	34	262	0.0136656	0.0427136	0.0130628	3.26987	0.129771	0	0	28	28	220	0.011254	0.0347395	0.0106858	3.25098	0.127273	0.0237138
TCGA-44-2666-01A	10	4	49	63	1866	73	1793	73513	103	194	86	383	21416	109	183	83	375	21778	70	156	311	537	15248	66	121	311	498	15071	1	5	22	28	218	0.0150054	0.0562249	0.0144649	3.887	0.12844	2	4	25	31	228	0.0166131	0.0577281	0.0149528	3.86069	0.135965	0.0251876
TCGA-44-6148-01A	1	1	15	17	462	16	446	18286	28	43	10	81	5376	21	54	22	97	5742	15	41	84	140	3497	26	30	72	128	3671	0	0	5	5	52	0.0108225	0.0390625	0.0141651	2.75766	0.0961538	0	0	6	6	55	0.012987	0.0428571	0.0157278	2.72494	0.109091	0.0238095
TCGA-49-4486-01A	1	15	19	35	9763	254	9509	389869	592	492	120	1204	109806	613	490	152	1255	110120	611	1816	1057	3484	84393	635	1768	1163	3566	85550	11	39	32	82	1130	0.00839906	0.022995	0.0132086	1.7409	0.0725664	10	44	41	95	1202	0.00973062	0.0272675	0.0142429	1.91446	0.0790349	0.00747721
TCGA-49-4510-01A	1	2	36	39	5155	124	5031	206271	317	369	119	805	58559	360	414	98	872	58816	259	777	597	1633	44460	241	925	555	1721	44436	9	24	45	78	684	0.0151309	0.0453225	0.0153929	2.94437	0.114035	4	19	28	51	634	0.00989331	0.0312309	0.01426	2.1901	0.0804416	0.014161
TCGA-49-4512-01A	3	4	24	31	2223	46	2177	89257	153	201	74	428	26719	121	238	75	434	26799	98	160	402	660	17966	103	156	396	655	17773	3	3	38	44	263	0.0197931	0.0671756	0.0147977	4.53959	0.1673	4	1	32	37	247	0.0166442	0.0560606	0.0137482	4.07767	0.149798	0.031489
TCGA-49-6742-01A	0	30	47	77	27871	404	27467	1126147	1073	1251	1183	3507	332740	1155	1261	1218	3634	332898	2661	2858	4681	10200	230185	2589	2998	4539	10126	230324	17	65	72	154	2567	0.00552546	0.0152084	0.0111452	1.36457	0.0599922	19	58	64	141	2578	0.00505902	0.0138235	0.0111997	1.23428	0.0546936	0.00487962
TCGA-50-5066-01A	2	5	153	160	27182	1123	26059	1068419	1871	1294	419	3584	318927	1910	1177	396	3483	318581	1367	6344	2115	9826	216367	1313	5802	2051	9166	214525	25	94	43	162	2233	0.00595983	0.017674	0.010409	1.69795	0.0725481	23	95	50	168	2150	0.00618056	0.0170975	0.00993682	1.72062	0.0781395	0.00342138
TCGA-50-5930-01A	0	1	533	534	127862	2398	125464	5144024	10270	3664	1308	15242	1450365	10772	3763	1285	15820	1450493	5199	34356	7137	46692	1120722	5284	35337	7089	47710	1122444	155	665	152	972	14707	0.00760195	0.0203731	0.0131027	1.55488	0.066091	145	684	148	977	14572	0.00764105	0.0209244	0.0130023	1.60928	0.0670464	0.00234628
TCGA-50-5932-01A	0	9	30	39	12013	312	11701	479741	765	563	207	1535	139309	761	563	212	1536	138901	540	2743	1104	4387	100914	514	2606	1123	4243	100617	9	46	49	104	1358	0.00865729	0.024511	0.0134967	1.81607	0.0765832	11	48	45	104	1299	0.00865729	0.0237064	0.0128723	1.84165	0.0800616	0.00782486
TCGA-50-6591-01A	3	14	52	69	5082	100	4982	204262	267	414	196	877	59648	230	470	203	903	59708	254	466	880	1600	42333	289	439	874	1602	42573	3	8	78	89	718	0.0175128	0.0555556	0.0168651	3.2941	0.123955	2	3	74	79	700	0.0155451	0.049375	0.0165356	2.98599	0.112857	0.0299095
TCGA-50-6597-01A	3	27	39	69	5466	79	5387	220867	307	401	175	883	65238	279	395	156	830	66043	335	491	1056	1882	44659	348	445	999	1792	44927	3	6	70	79	667	0.014453	0.0440848	0.0148463	2.96941	0.118441	1	6	75	82	626	0.0150018	0.0435707	0.0140173	3.10834	0.13099	0.0265276
TCGA-55-1594-01A	2	3	43	48	13050	224	12826	525866	801	905	304	2010	155686	734	968	318	2020	156992	1076	1737	1482	4295	106581	1096	1868	1537	4501	106607	13	31	45	89	1095	0.00681992	0.0197734	0.0102714	1.9251	0.0812785	7	26	43	76	1073	0.00582375	0.017695	0.0100675	1.75764	0.0708295	0.0067433
TCGA-55-1596-01A	0	10	84	94	25382	631	24751	1014791	1636	2501	570	4707	305880	1723	2482	561	4766	304317	1467	4185	2158	7810	201820	1419	4005	2044	7468	202774	20	72	44	136	1935	0.00535813	0.018211	0.00954264	1.90838	0.0702842	38	80	53	171	1859	0.00673706	0.021895	0.00921118	2.377	0.0919849	0.00382161
TCGA-55-6972-01A	0	15	201	216	31745	937	30808	1263128	1866	1399	508	3773	368787	1731	1360	511	3602	369718	2006	6085	3789	11880	262378	1878	5757	3918	11553	262233	35	94	93	222	3224	0.00699323	0.0192158	0.0122944	1.56297	0.0688586	22	91	82	195	3155	0.0061427	0.0164141	0.0120246	1.36504	0.0618067	0.00551268
TCGA-55-6982-01A	2	10	25	37	4985	97	4888	200408	181	269	113	563	60692	185	269	99	553	61068	520	421	977	1918	39725	522	410	922	1854	38923	1	1	16	18	358	0.00361083	0.00970874	0.00919765	1.05557	0.0502793	1	6	15	22	360	0.00441324	0.0114703	0.0090623	1.26571	0.0611111	0.00621866
TCGA-55-6984-01A	1	2	45	48	2087	68	2019	82779	103	175	62	340	23450	78	225	85	388	23732	78	152	425	655	17725	81	166	389	636	17872	1	2	41	44	321	0.0210829	0.0691824	0.0179611	3.8518	0.137072	1	1	46	48	310	0.0229995	0.0732824	0.0174894	4.1901	0.154839	0.0416866
TCGA-55-6986-01A	2	1	10	13	1030	29	1001	41041	63	116	38	217	12465	67	149	47	263	12608	38	65	175	278	7994	34	59	150	243	7974	1	0	15	16	124	0.015534	0.0658436	0.0155505	4.23417	0.129032	1	0	14	15	111	0.0145631	0.0539568	0.0138854	3.88586	0.135135	0.0281553
TCGA-55-7281-01A	1	7	176	184	50725	1171	49554	2031714	3019	2194	540	5753	597692	3053	2183	500	5736	597270	2590	12599	3485	18674	417678	2518	13345	3528	19391	419074	51	234	71	356	4609	0.00701824	0.018359	0.0109981	1.6693	0.0772402	54	221	85	360	4574	0.00709709	0.0192781	0.010951	1.7604	0.0787057	0.00307541
TCGA-55-8299-01A	1	0	12	13	871	39	832	34112	57	39	27	123	9554	54	48	24	126	9997	37	163	95	295	7162	36	159	93	288	7399	2	3	2	7	131	0.00803674	0.0243056	0.0177051	1.3728	0.0534351	0	5	4	9	140	0.010333	0.0305085	0.0195476	1.56073	0.0642857	0.00688863
TCGA-64-1678-01A	0	10	176	186	50526	1292	49234	2018594	2925	2073	497	5495	568298	2999	2127	515	5641	572258	2386	12760	3671	18817	437660	2356	13143	3782	19281	440365	45	261	89	395	5701	0.00781776	0.0204865	0.0129461	1.58245	0.0692861	73	285	87	445	5741	0.00880735	0.0236488	0.0131175	1.80285	0.0775126	0.00348336
TCGA-67-3771-01A	0	13	497	510	100647	2945	97702	4005782	5804	5832	1611	13247	1190024	5915	5787	1518	13220	1194615	7321	18037	10057	35415	809743	7378	18130	10312	35820	811400	78	286	150	514	7176	0.00510696	0.0143495	0.00884397	1.62252	0.0716276	83	295	170	548	7340	0.00544477	0.0154737	0.0090646	1.70704	0.0746594	0.00317943
TCGA-67-3772-01A	0	6	18	24	1720	29	1691	69331	97	166	60	323	21153	115	159	78	352	21284	113	119	293	525	13439	108	129	254	491	13455	1	1	10	12	112	0.00697674	0.0244399	0.00832404	2.93606	0.107143	0	0	15	15	133	0.00872093	0.0285714	0.00989657	2.887	0.112782	0.0145349
TCGA-67-6215-01A	5	5	25	35	7580	58	7522	308402	299	848	1567	2714	93846	324	841	1557	2722	93694	106	306	679	1091	60571	116	244	635	995	60291	1	3	46	50	622	0.00659631	0.0502513	0.0103166	4.8709	0.0803859	2	1	40	43	642	0.00567282	0.0394134	0.0105991	3.71855	0.0669782	0.0113456
TCGA-73-4659-01A	5	4	45	54	19322	505	18817	771497	1137	818	212	2167	211552	1203	788	225	2216	213373	938	4649	1551	7138	173133	963	4875	1458	7296	173439	24	129	50	203	2477	0.0105062	0.0278235	0.0142817	1.94819	0.081954	19	115	47	181	2449	0.00936756	0.0253572	0.0141452	1.79264	0.0739077	0.00502018
TCGA-75-5147-01A	2	3	53	58	3599	99	3500	143500	194	312	117	623	42739	195	332	108	635	43057	166	369	624	1159	28813	195	333	555	1083	28874	5	4	55	64	408	0.0177827	0.0590951	0.0141304	4.18214	0.156863	1	1	49	51	375	0.0141706	0.0440035	0.013015	3.38099	0.136	0.0288969
TCGA-75-6203-01A	3	1	72	76	1071	148	923	37843	62	96	44	202	11356	53	118	43	214	11297	43	59	139	241	7711	37	49	180	266	7476	1	2	21	24	120	0.022409	0.0902256	0.0160514	5.62105	0.2	0	1	11	12	123	0.0112045	0.0497925	0.0159512	3.12155	0.097561	0.0298786
TCGA-75-7030-01A	8	2	63	73	736	86	650	26650	39	86	34	159	7345	26	79	27	132	8023	32	42	107	181	5643	31	38	109	178	5631	3	0	12	15	104	0.0203804	0.0842697	0.0184692	4.56272	0.144231	4	1	6	11	111	0.0149457	0.0607735	0.0196704	3.08959	0.0990991	0.0244565
TCGA-78-7146-01A	0	18	91	109	34518	781	33737	1383217	2117	1515	597	4229	408777	2120	1488	579	4187	409686	2193	7805	2842	12840	282763	2159	7482	2840	12481	281991	20	94	47	161	3041	0.00466423	0.0128996	0.010784	1.19618	0.0529431	36	102	56	194	3098	0.00562026	0.015109	0.0109562	1.37904	0.062621	0.00298395
TCGA-78-7156-01A	1	20	67	88	29666	816	28850	1182850	1752	1046	400	3198	347084	1840	1097	381	3318	347403	1553	6749	2547	10849	243689	1534	7295	2656	11485	244674	32	120	44	196	2686	0.00660689	0.0170657	0.0109779	1.55456	0.072971	23	103	52	178	2623	0.00600013	0.016407	0.0107637	1.52429	0.0678612	0.00323603
TCGA-78-7158-01A	0	5	134	139	35995	917	35078	1438198	2316	1623	479	4418	416411	2273	1547	483	4303	418951	1747	8601	3021	13369	301584	1737	8275	2976	12988	301252	39	157	90	286	3723	0.00794555	0.0220203	0.0123584	1.78181	0.0768198	43	180	96	319	3793	0.00886234	0.0238612	0.0125769	1.89722	0.0841023	0.00516738
TCGA-78-7535-01A	3	8	83	94	19092	517	18575	761575	1487	1501	605	3593	222147	1483	1477	635	3595	222012	740	3402	1636	5778	159166	771	3247	1591	5609	158240	8	64	56	128	1982	0.00670438	0.0228205	0.0125253	1.82195	0.0645812	19	60	49	128	1974	0.00670438	0.022153	0.0124021	1.78622	0.064843	0.00549969
TCGA-91-6840-01A	0	37	40	77	13550	145	13405	549605	590	591	294	1475	163823	594	645	271	1510	165676	1716	1536	1936	5188	110064	1723	1545	1964	5232	110042	2	9	63	74	1130	0.00546125	0.0141437	0.0102688	1.37735	0.0654867	6	17	77	100	1194	0.00738007	0.0192753	0.0108482	1.77681	0.0837521	0.0103321
TCGA-91-6847-01A	4	16	68	88	6775	115	6660	273060	297	521	223	1041	79180	351	526	219	1096	79614	426	674	1251	2351	56901	376	676	1120	2172	57365	2	5	102	109	906	0.0160886	0.0501842	0.0157936	3.1775	0.120309	4	14	151	169	955	0.0249446	0.0718843	0.0167835	4.28302	0.176963	0.0373432
TCGA-97-8171-01A	1	19	30	50	5642	88	5554	227714	398	464	135	997	67223	376	433	155	964	66533	182	527	1090	1799	47249	219	470	1105	1794	46709	1	5	114	120	802	0.0212691	0.0668896	0.0171701	3.8957	0.149626	2	15	94	111	791	0.0196739	0.0617009	0.0167411	3.6856	0.140329	0.0368664
Totals	77	471	4971	5519	1091123	26983	1064140	43629740	66596	53633	19053	139282	12609299	67570	53942	18971	140483	12631379	62351	229449	101135	392935	9196279	61680	229767	99993	391440	9192701	1071	4156	2876	8103	110451	0.00742629	0.0207005	0.0120151	1.72288	0.0733628	1085	4255	2981	8321	110091	0.00762609	0.0211765	0.0119713	1.76895	0.0755829	0.00536786
[truncated: 12 more columns]

[truncated: 19 more sheets: gCg_to_T_LUSC, gCg_to_T_PRAD, gCg_to_T_SKCM, gCg_to_T_THCA, gCg_to_T_UCEC, ggCg_to_T_BLCA, ggCg_to_T_BRCA, ggCg_to_T_CRC, ggCg_to_T_GBM, ggCg_to_T_HNSC, ggCg_to_T_KICH, ggCg_to_T_KIRC, ggCg_to_T_LGG, ggCg_to_T_LUAD, ggCg_to_T_LUSC, ggCg_to_T_PRAD, ggCg_to_T_SKCM, ggCg_to_T_THCA, ggCg_to_T_UCEC]
